# Supplementary material for: Dicarabrol A, dicarabrone C and dipulchellin A, unique sesquiterpene lactone dimers from Carpesium abrotanoides
Source: Royal Society of Chemistry journal article supplement (doi:10.1039/c6ra27626a), 2017-01-01
Supplement: c6ra27626a1.pdf [file c6ra27626a1.pdf]

## Supporting Information for

### **Dicarabrol A, dicarabrone C and dipulchellin A, unique sesquiterpene lactone dimers from *Carpesium abrotanoides* †**

Jie-Wei Wu,<sup>ab</sup> Chun-Ping Tang,<sup>a</sup> Chang-Qiang Ke,<sup>a</sup> Sheng Yao,<sup>a</sup> Li-Gen Lin<sup>\*c</sup> and Yang Ye<sup>\*ad</sup>

<sup>a</sup>State Key Laboratory of Drug Research, & Natural Products Chemistry Department, Shanghai Institute of Materia Medica, Chinese Academy of Sciences, Shanghai 201203, P. R. China

<sup>b</sup>University of Chinese Academy of Sciences, Beijing 100049, P. R. China

<sup>c</sup>State Key Laboratory of Quality Research in Chinese Medicine, Institute of Chinese Medical Sciences, University of Macau, Macao 999078, R. R. China

<sup>d</sup>School of Life Science and Technology, ShanghaiTech University, Shanghai 201203, P. R. China

## Experimental Section

### X-ray crystallographic analyses.

**Table S1.** X-ray crystallographic data for dipulchellin A (**3**)

**Figure S1.**  $^1\text{H}$  NMR spectrum of dicarabrol A (**1**) in  $\text{CDCl}_3$

**Figure S2.**  $^{13}\text{C}$  NMR spectrum of dicarabrol A (**1**) in  $\text{CDCl}_3$

**Figure S3.**  $^1\text{H}$ - $^1\text{H}$  COSY spectrum of dicarabrol A (**1**) in  $\text{CDCl}_3$

**Figure S4.** HSQC spectrum of dicarabrol A (**1**) in  $\text{CDCl}_3$

**Figure S5.** HMBC spectrum of dicarabrol A (**1**) in  $\text{CDCl}_3$

**Figure S6.** ROESY spectrum of dicarabrol A (**1**) in  $\text{CDCl}_3$

**Figure S7.** IR spectrum of dicarabrol A (**1**)

**Figure S8.** HRESI(+)MS spectrum of dicarabrol A (**1**)

**Figure S9.**  $^1\text{H}$  NMR spectrum of dicarabrone C (**2**) in  $\text{CDCl}_3$

**Figure S10.**  $^{13}\text{C}$  NMR spectrum of dicarabrone C (**2**) in  $\text{CDCl}_3$

**Figure S11.**  $^1\text{H}$ - $^1\text{H}$  COSY spectrum of dicarabrone C (**2**) in  $\text{CDCl}_3$

**Figure S12.** HSQC spectrum of dicarabrone C (**2**) in  $\text{CDCl}_3$

**Figure S13.** HMBC spectrum of dicarabrone C (**2**) in  $\text{CDCl}_3$

**Figure S14.** ROESY spectrum of dicarabrone C (**2**) in  $\text{CDCl}_3$

**Figure S15.** IR spectrum of dicarabrone C (**2**)

**Figure S16.** HRESI(+)MS spectrum of dicarabrone C (**2**)

**Figure S17.**  $^1\text{H}$  NMR spectrum of dipulchellin A (**3**) in  $\text{CDCl}_3$

**Figure S18.**  $^{13}\text{C}$  NMR spectrum of dipulchellin A (**3**) in  $\text{CDCl}_3$

**Figure S19.**  $^1\text{H}$ - $^1\text{H}$  COSY spectrum of dipulchellin A (**3**) in  $\text{CDCl}_3$

**Figure S20.** HSQC spectrum of dipulchellin A (**3**) in  $\text{CDCl}_3$

**Figure S21.** HMBC spectrum of dipulchellin A (**3**) in  $\text{CDCl}_3$

**Figure S22.** ROESY spectrum of dipulchellin A (**3**) in  $\text{CDCl}_3$

**Figure S23.** IR spectrum of dipulchellin A (**3**)

**Figure S24.** HRESI(+)MS spectrum of dipulchellin A (**3**)

## Experimental Section

**X-ray crystallographic analyses.** Dipulchellin A (**3**) was crystallized from acetone at room temperature. The X-ray crystallographic data was obtained on a Bruker SMART CCD detector employing graphite monochromated Cu-K $\alpha$  radiation ( $\lambda = 1.54178$  Å) (operated in the  $\varphi$ - $\omega$  scan mode). The structure was solved by direct method using SHELXS-97 program and refined with full-matrix least-squares calculations on *F*<sup>2</sup> using SHELXL-97. Crystallographic data for **3** (key parameters see Table S1) have been deposited at the Cambridge Crystallographic Data Centre (Deposition No.: CCDC 1479445). Copies of these data can be obtained free of charge via the internet at [www.ccdc.cam.ac.uk/conts/retrieving.html](http://www.ccdc.cam.ac.uk/conts/retrieving.html) or on application to CCDC, 12 Union Road, Cambridge CB2 1EZ, UK [Tel: (+44) 1223-336-408; Fax: (+44) 1223-336-033; E-mail: [deposit@ccdc.cam.ac.uk](mailto:deposit@ccdc.cam.ac.uk)].

**Table S1.** X-ray crystallographic data for dipulchellin A (**3**)

| Crystal data                             |                                               |
|------------------------------------------|-----------------------------------------------|
| $C_{34}H_{44}O_7$                        | $F(000) = 1216$                               |
| $M_r = 564.69$                           | $D_x = 1.221 \text{ Mg m}^{-3}$               |
| Orthorhombic, $P2_12_12_1$               | Cu $K\alpha$ radiation, $\lambda = 1.54178$ Å |
| $a = 10.4583$ (1) Å                      | $\mu = 0.68 \text{ mm}^{-1}$                  |
| $b = 13.3200$ (2) Å                      | $T = 296 \text{ K}$                           |
| $c = 22.0536$ (3) Å                      | Plate, colourless                             |
| $V = 3072.17$ (7) Å <sup>3</sup>         | $0.15 \times 0.1 \times 0.05 \text{ mm}$      |
| $Z = 4$                                  |                                               |
| Data collection                          |                                               |
| Radiation source: fine-focus sealed tube | $R_{\text{int}} = 0.034$                      |

---

|                                                                |                                                                        |
|----------------------------------------------------------------|------------------------------------------------------------------------|
| graphite                                                       | $\theta_{\max} = 67.7^\circ, \theta_{\min} = 3.9^\circ$                |
| 40986 measured reflections                                     | $h = -10 \rightarrow 12$                                               |
| 5469 independent reflections                                   | $k = -15 \rightarrow 14$                                               |
| 5246 reflections with $I > 2\sigma(I)$                         | $l = -26 \rightarrow 25$                                               |
| <b>Refinement</b>                                              |                                                                        |
| Refinement on $F^2$                                            | Secondary atom site location: difference Fourier map                   |
| Least-squares matrix: full                                     | Hydrogen site location: inferred from neighbouring sites               |
| $R[F^2 > 2\sigma(F^2)] = 0.099$                                | H atoms treated by a mixture of independent and constrained refinement |
| $wR(F^2) = 0.308$                                              | $w = 1/[\sigma^2(F_o^2) + (0.2P)^2]$ where $P = (F_o^2 + 2F_c^2)/3$    |
| $S = 1.54$                                                     | $(\Delta/\sigma)_{\max} = 0.179$                                       |
| 5469 reflections                                               | $\square\Delta_{\max} = 0.93 \text{ e } \text{\AA}^{-3}$               |
| 377 parameters                                                 | $\square\Delta_{\min} = -1.14 \text{ e } \text{\AA}^{-3}$              |
| 22 restraints                                                  | Absolute structure: Flack H D (1983), Acta Cryst. A39, 876-881         |
| Primary atom site location: structure-invariant direct methods | Flack parameter: 0.1 (4)                                               |

---

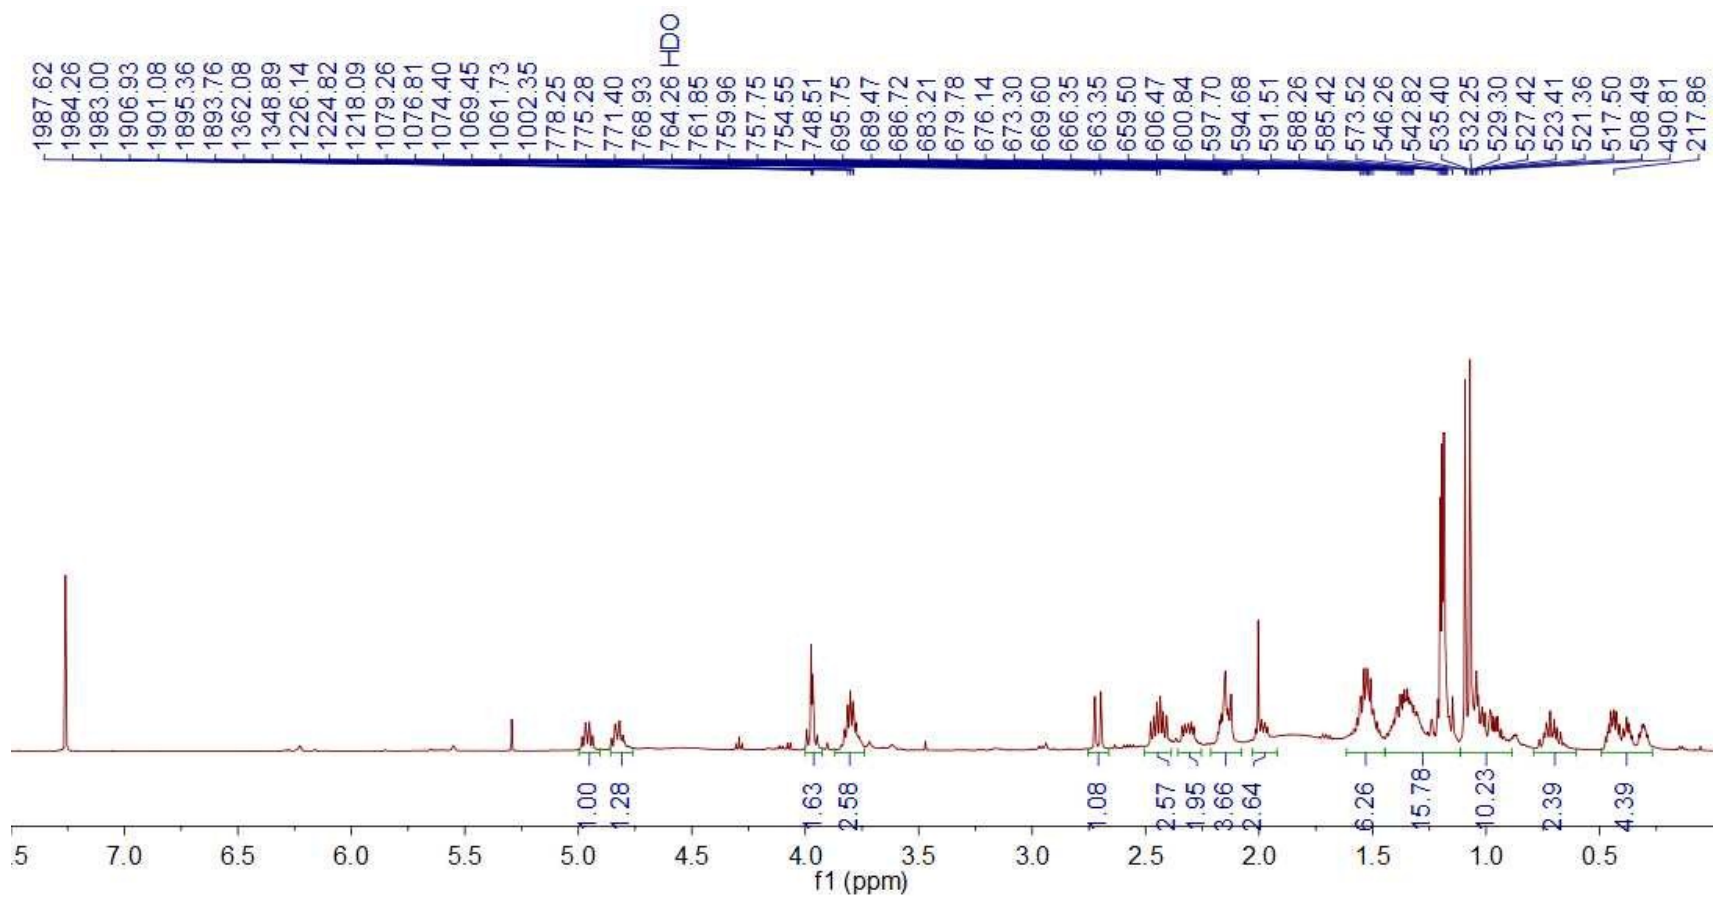

**Figure S1.**  $^1\text{H}$  NMR spectrum of dicarabrol A (**1**) in  $\text{CDCl}_3$

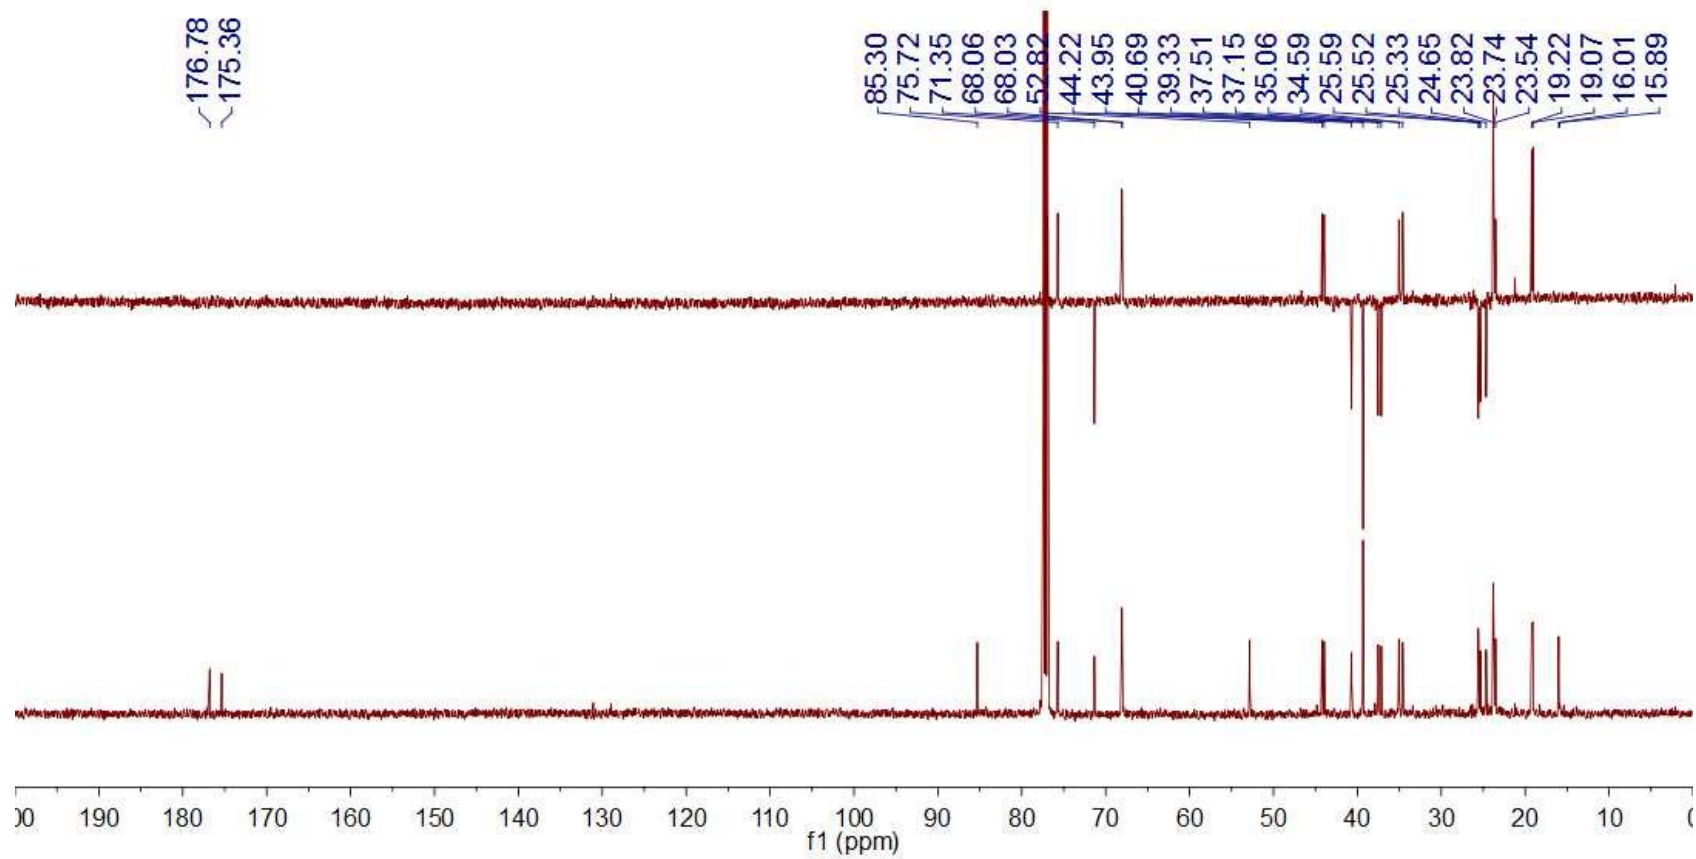

**Figure S2.**  $^{13}\text{C}$  NMR spectrum of dicarabrol A (**1**) in  $\text{CDCl}_3$

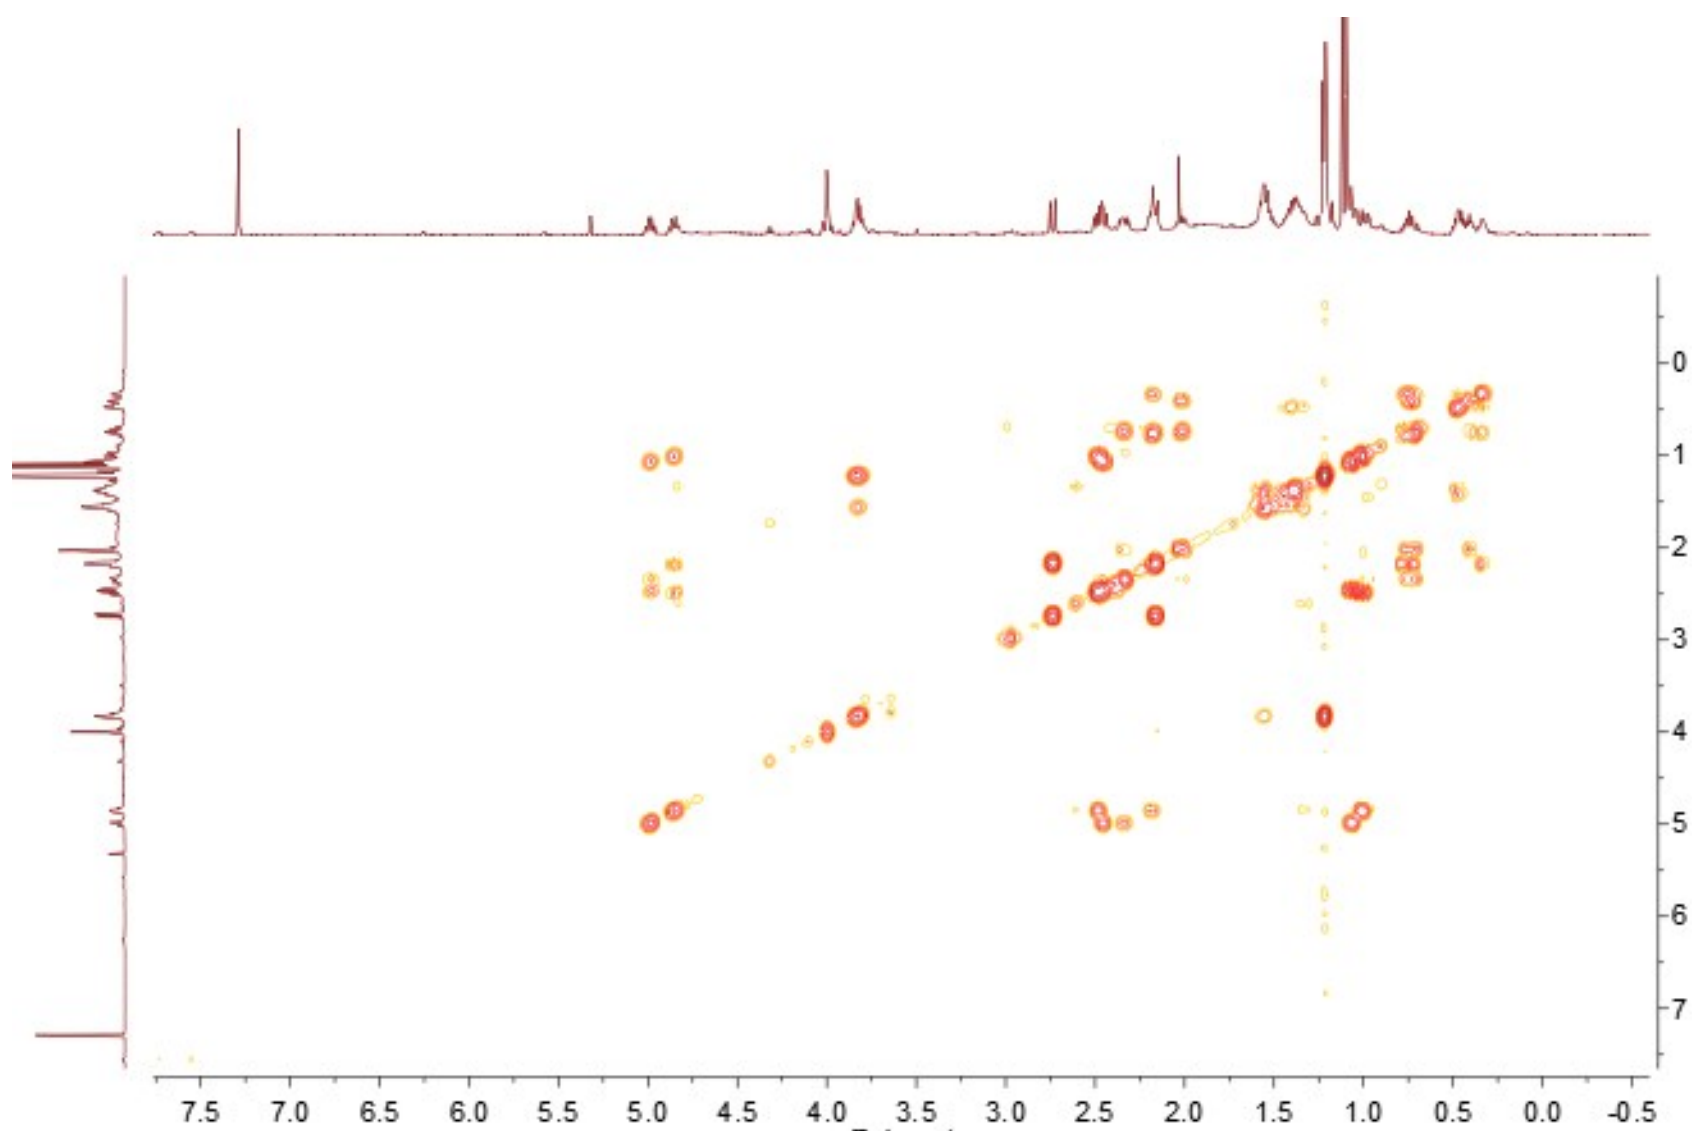

**Figure S3.**  $^1\text{H}$ - $^1\text{H}$  COSY spectrum of dicarabrol A (**1**) in  $\text{CDCl}_3$

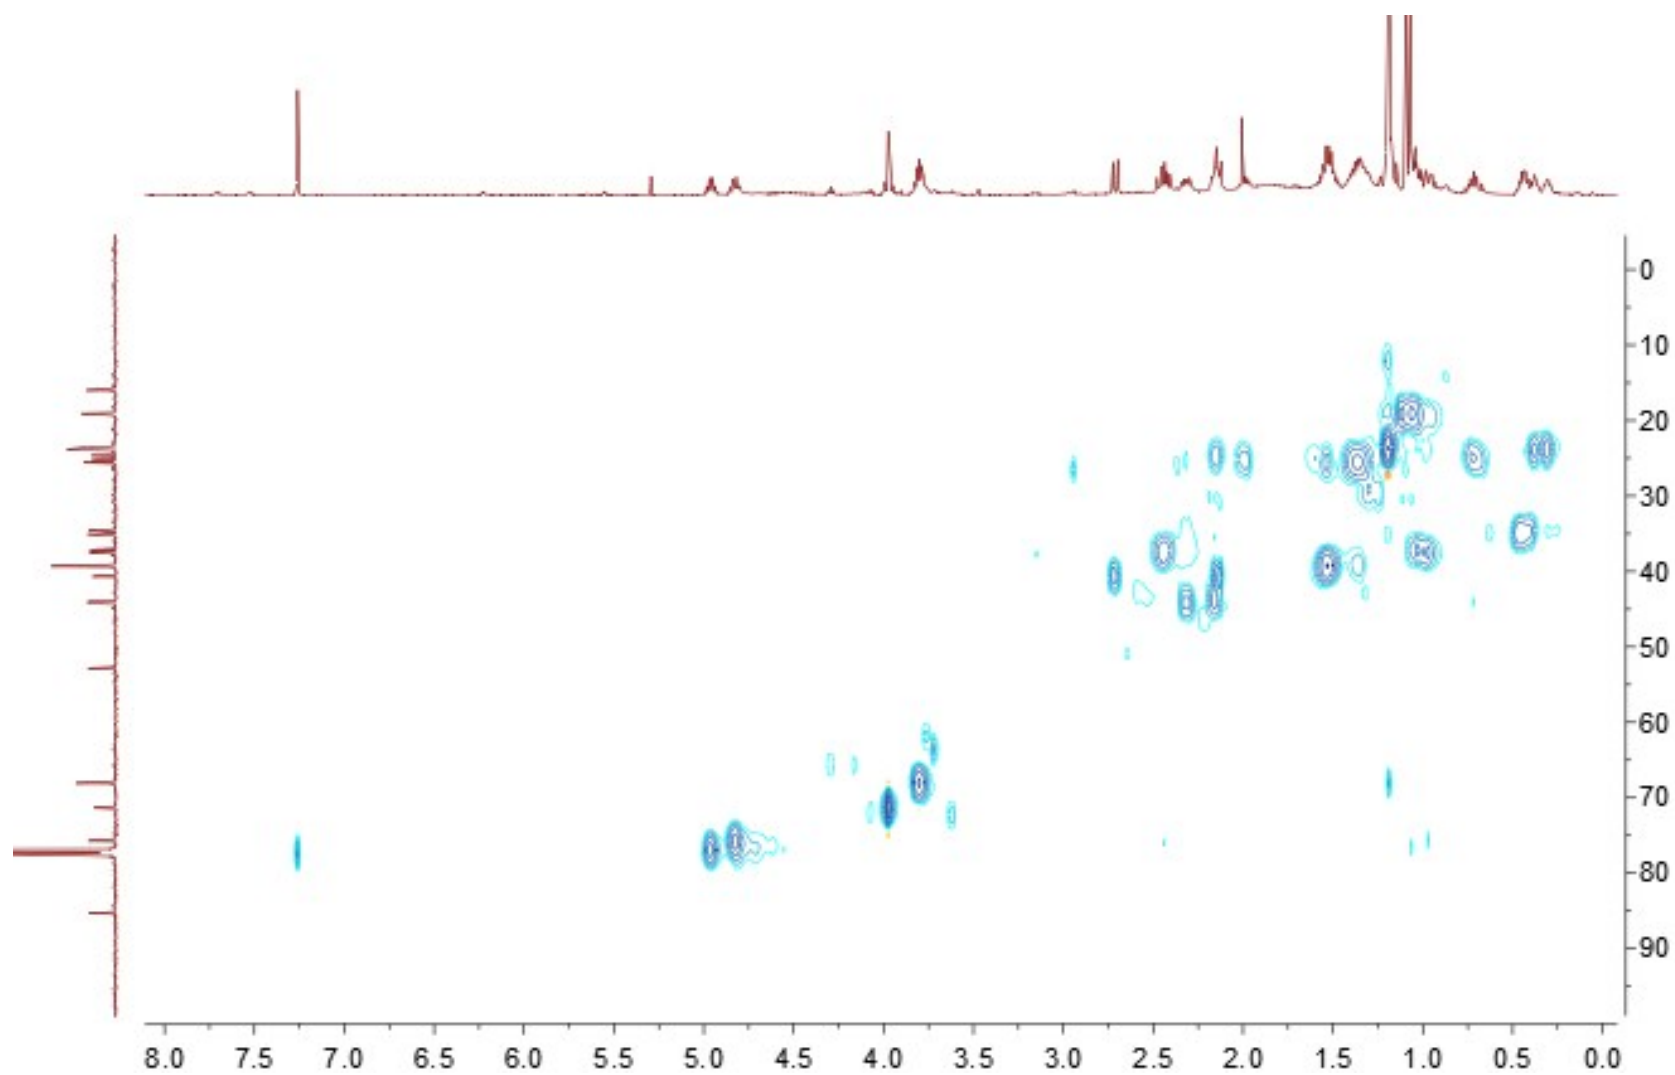

**Figure S4.** HSQC spectrum of dicarabrol A (**1**) in CDCl<sub>3</sub>

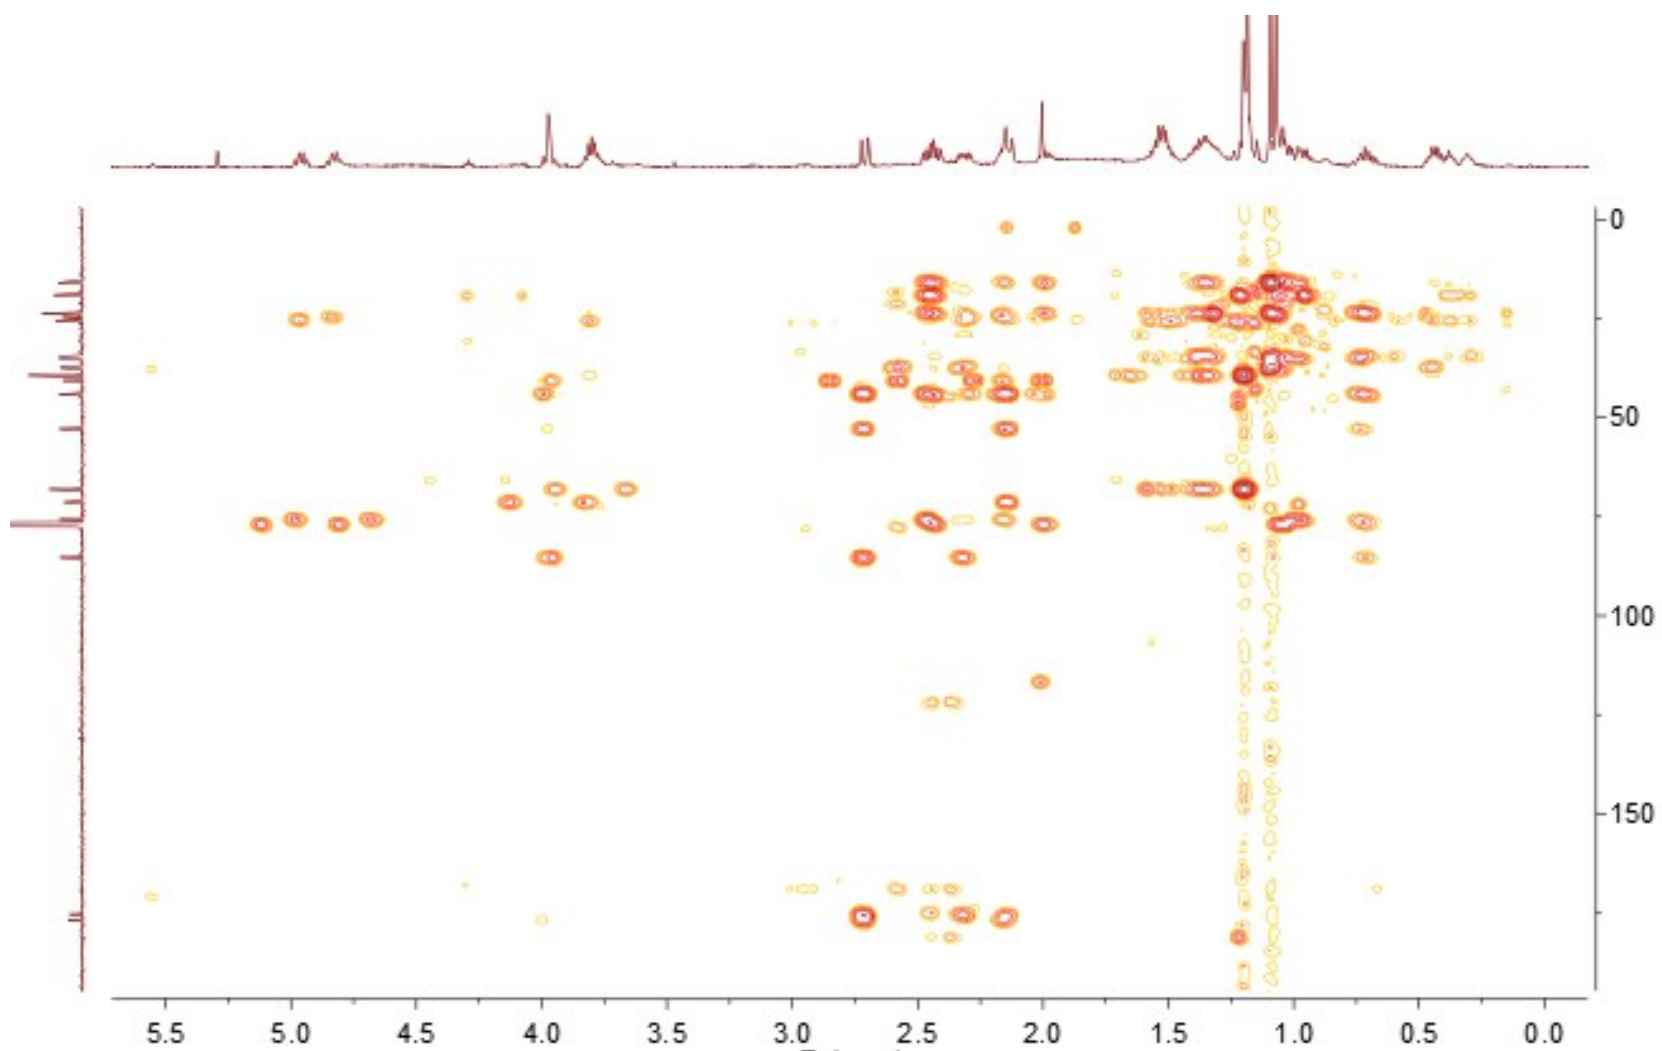

**Figure S5.** HMBC spectrum of dicarabrol A (**1**) in  $\text{CDCl}_3$

TMJ-DG1617 CDC13 ROESY

Sample Name:

Data Collected on:

400MR-vnmrs400

Archive directory:

Sample directory:

FidFile: ROESY

Pulse Sequence: ROESY

Solvent: cdc13

Data collected on: May 21 2013

Temp. 20.0 C / 293.1 K

Operator: chenpeck

Relax. delay 1.000 sec

Acq. time 0.107 sec

Width 5542.0 Hz

2D Width 5542.0 Hz

8 repetitions

2 x 280 increments

OBSERVE H1, 399.7904842 MHz

DATA PROCESSING

Gauss apodization 0.045 sec

F1 DATA PROCESSING

Gauss apodization 0.012 sec

FT size 2048 x 2048

Total time 1 hr, 39 min

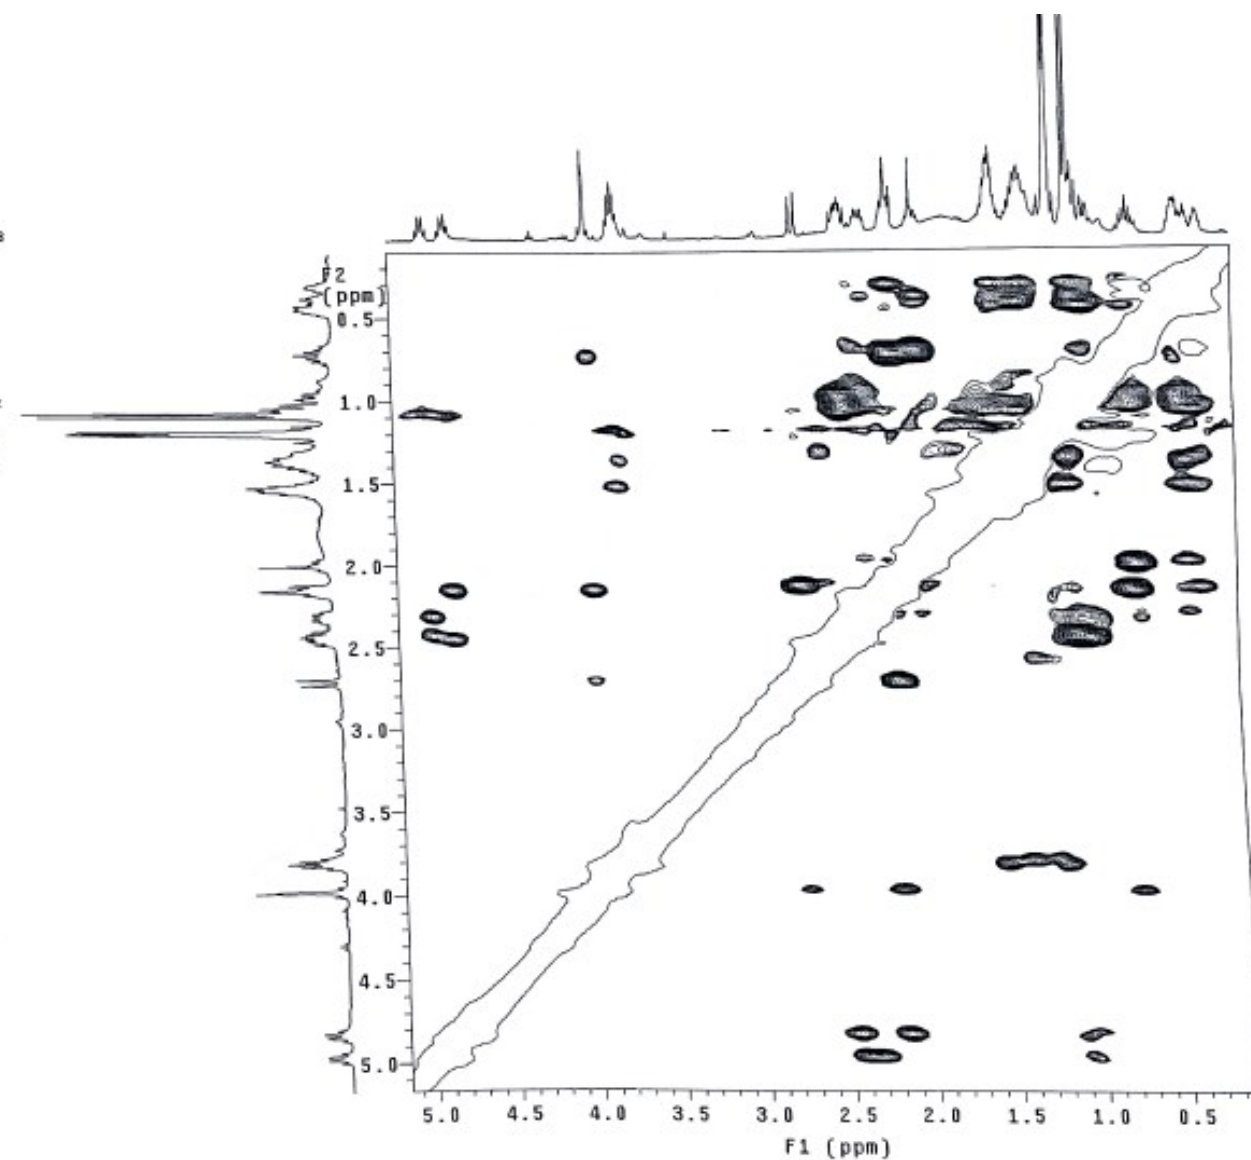

**Figure S6.** ROESY spectrum of dicarabrol A (**1**) in  $\text{CDCl}_3$

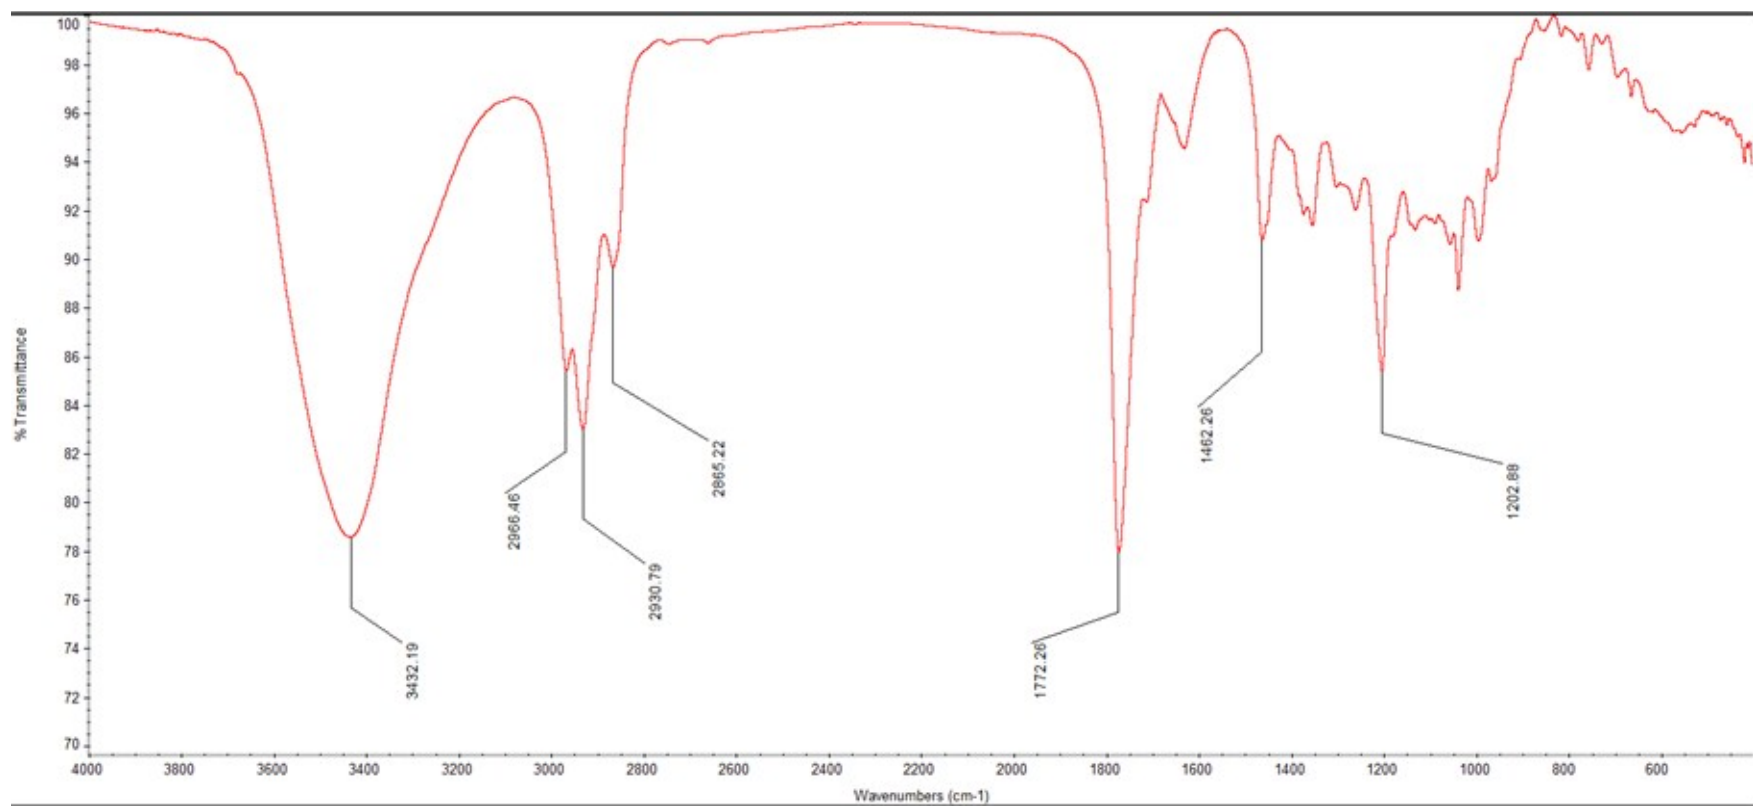

**Figure S7.** IR spectrum of dicarabrol A (**1**)

# Elemental Composition Report

Page 1

Tolerance = 10.0 PPM / DBE: min = -1.5, max = 50.0  
Isotope cluster parameters: Separation = 1.0 Abundance = 1.0%

Monoisotopic Mass, Odd and Even Electron Ions  
15 formula(e) evaluated with 1 results within limits (up to 20 closest results for each mass)

SIMM-Mass Spec

TMJ-DG1617

130821 68 (1.287) AM (Cen,5, 80.00, Ht,9000.0,566.89,0.70); Sm (Mn, 2x0.00); Cm (63:68)

Q-ToF Ultima

12-Oct-2013 13:57:13

TOF MS ES+  
1.01e3

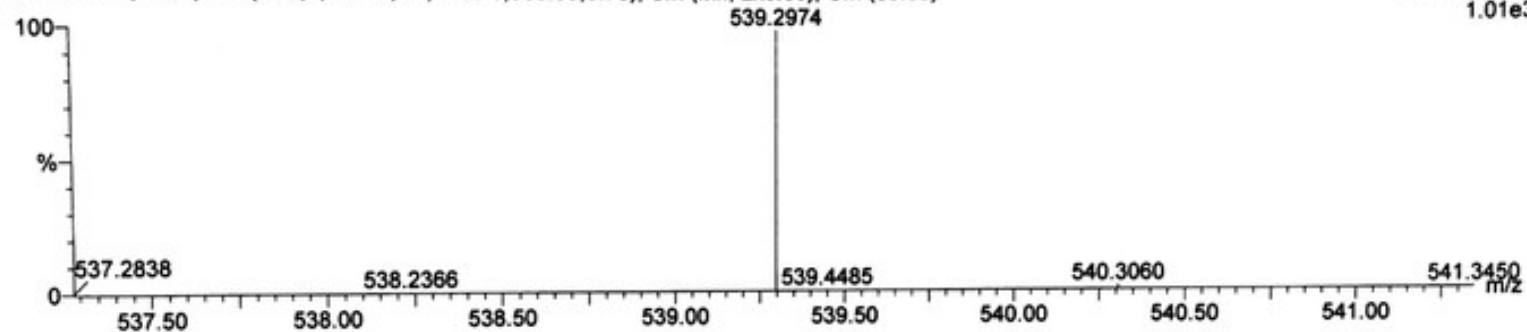

Minimum: 50.00  
Maximum: 100.00

200.0 10.0 -1.5  
50.0

| Mass     | RA     | Calc. Mass | mDa  | PPM  | DBE | Score | Formula       |
|----------|--------|------------|------|------|-----|-------|---------------|
| 539.2974 | 100.00 | 539.2985   | -1.1 | -2.0 | 8.5 | 1     | C30 H44 O7 Na |

Figure S8. HRESI(+)MS spectrum of dicarabrol A (1)

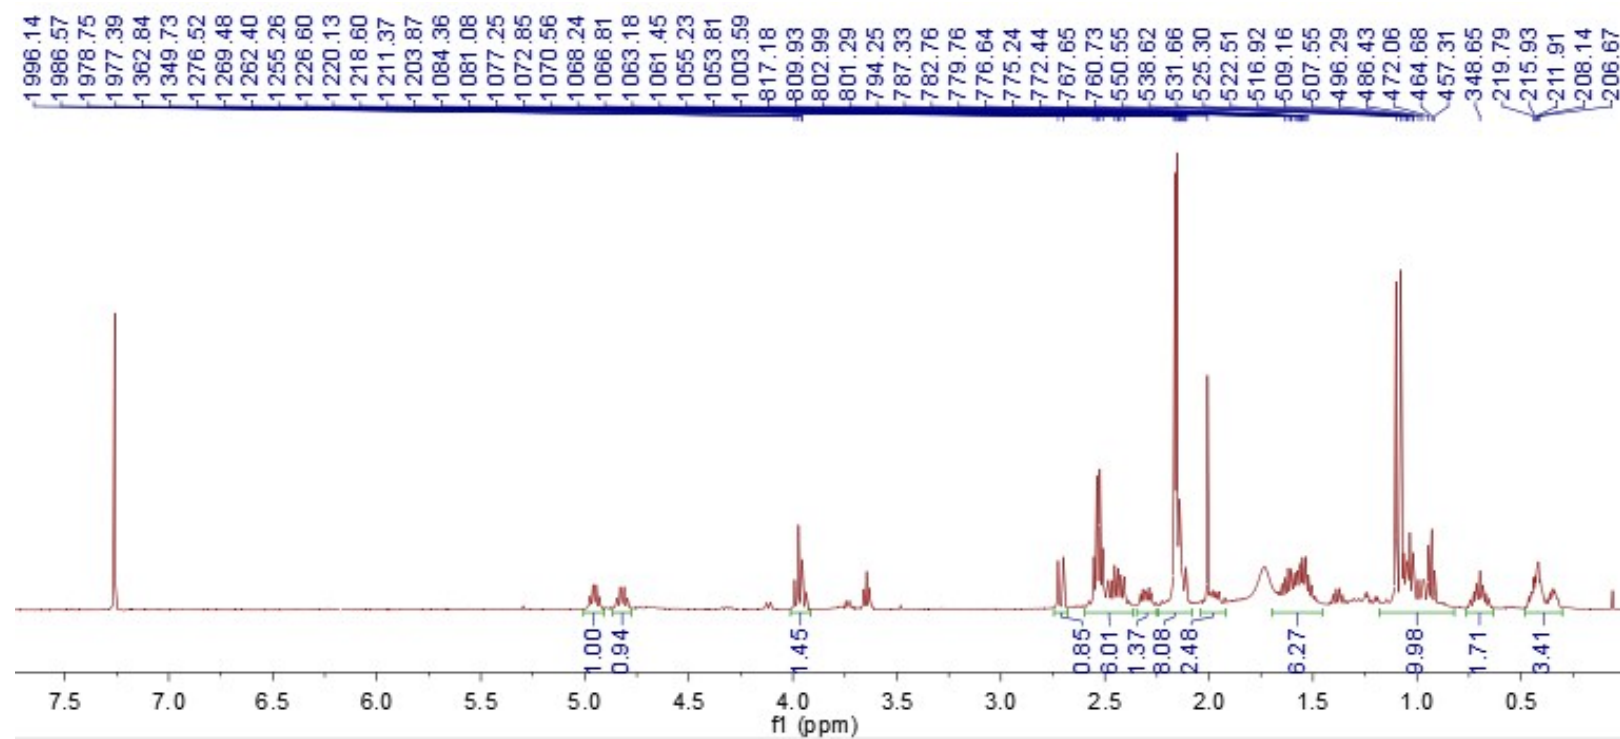

**Figure S9.**  $^1\text{H}$  NMR spectrum of dicarabrone C (2) in  $\text{CDCl}_3$

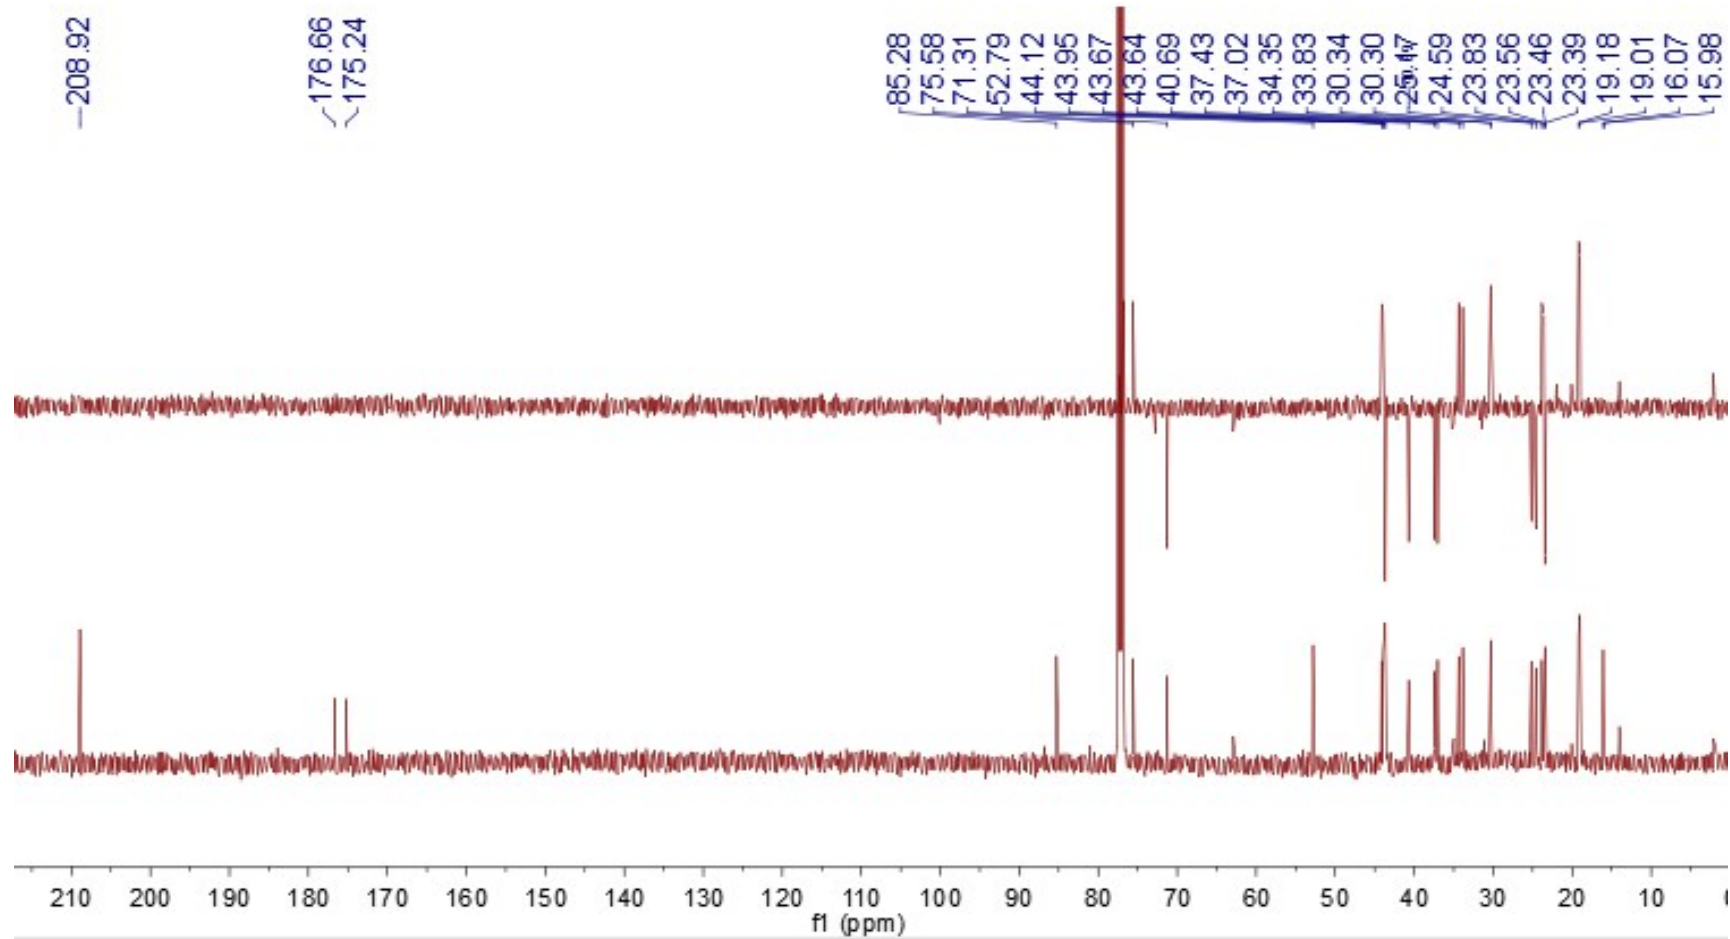

**Figure S10.** <sup>13</sup>C NMR spectrum of dicarabrone C (**2**) in CDCl<sub>3</sub>

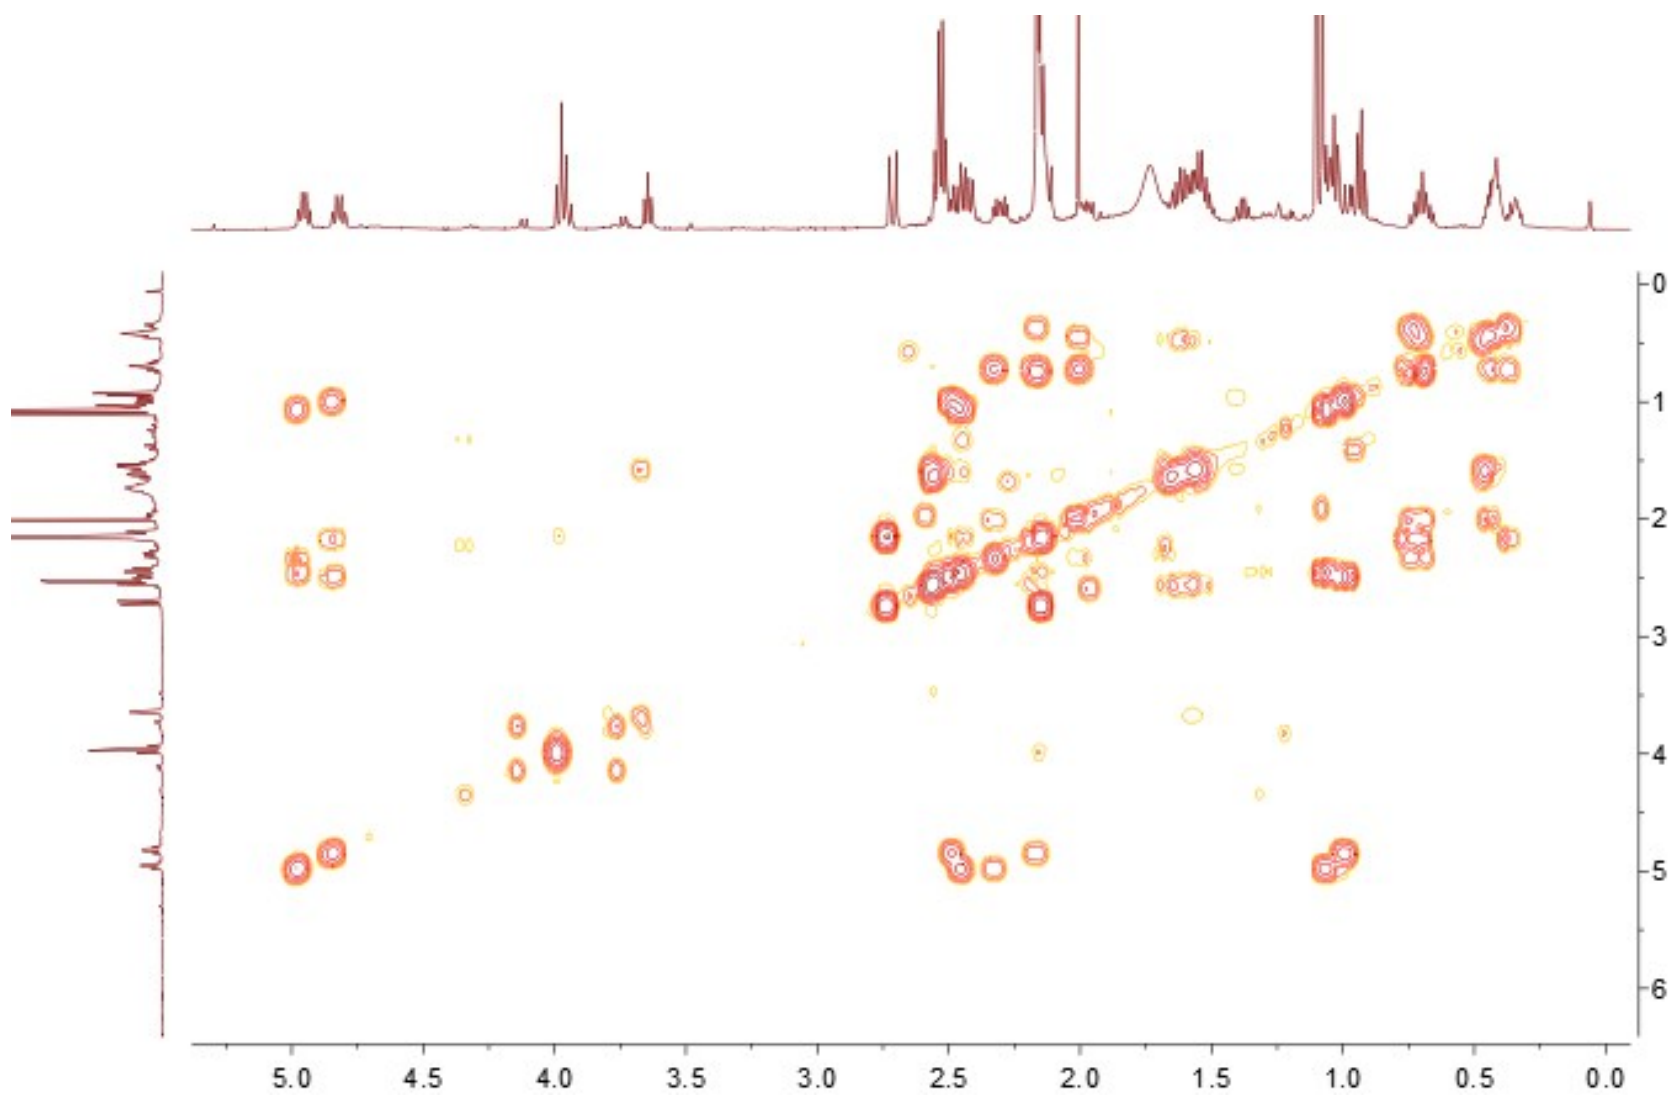

**Figure S11.**  $^1\text{H}$ - $^1\text{H}$  COSY spectrum of dicarabrone C (**2**) in  $\text{CDCl}_3$

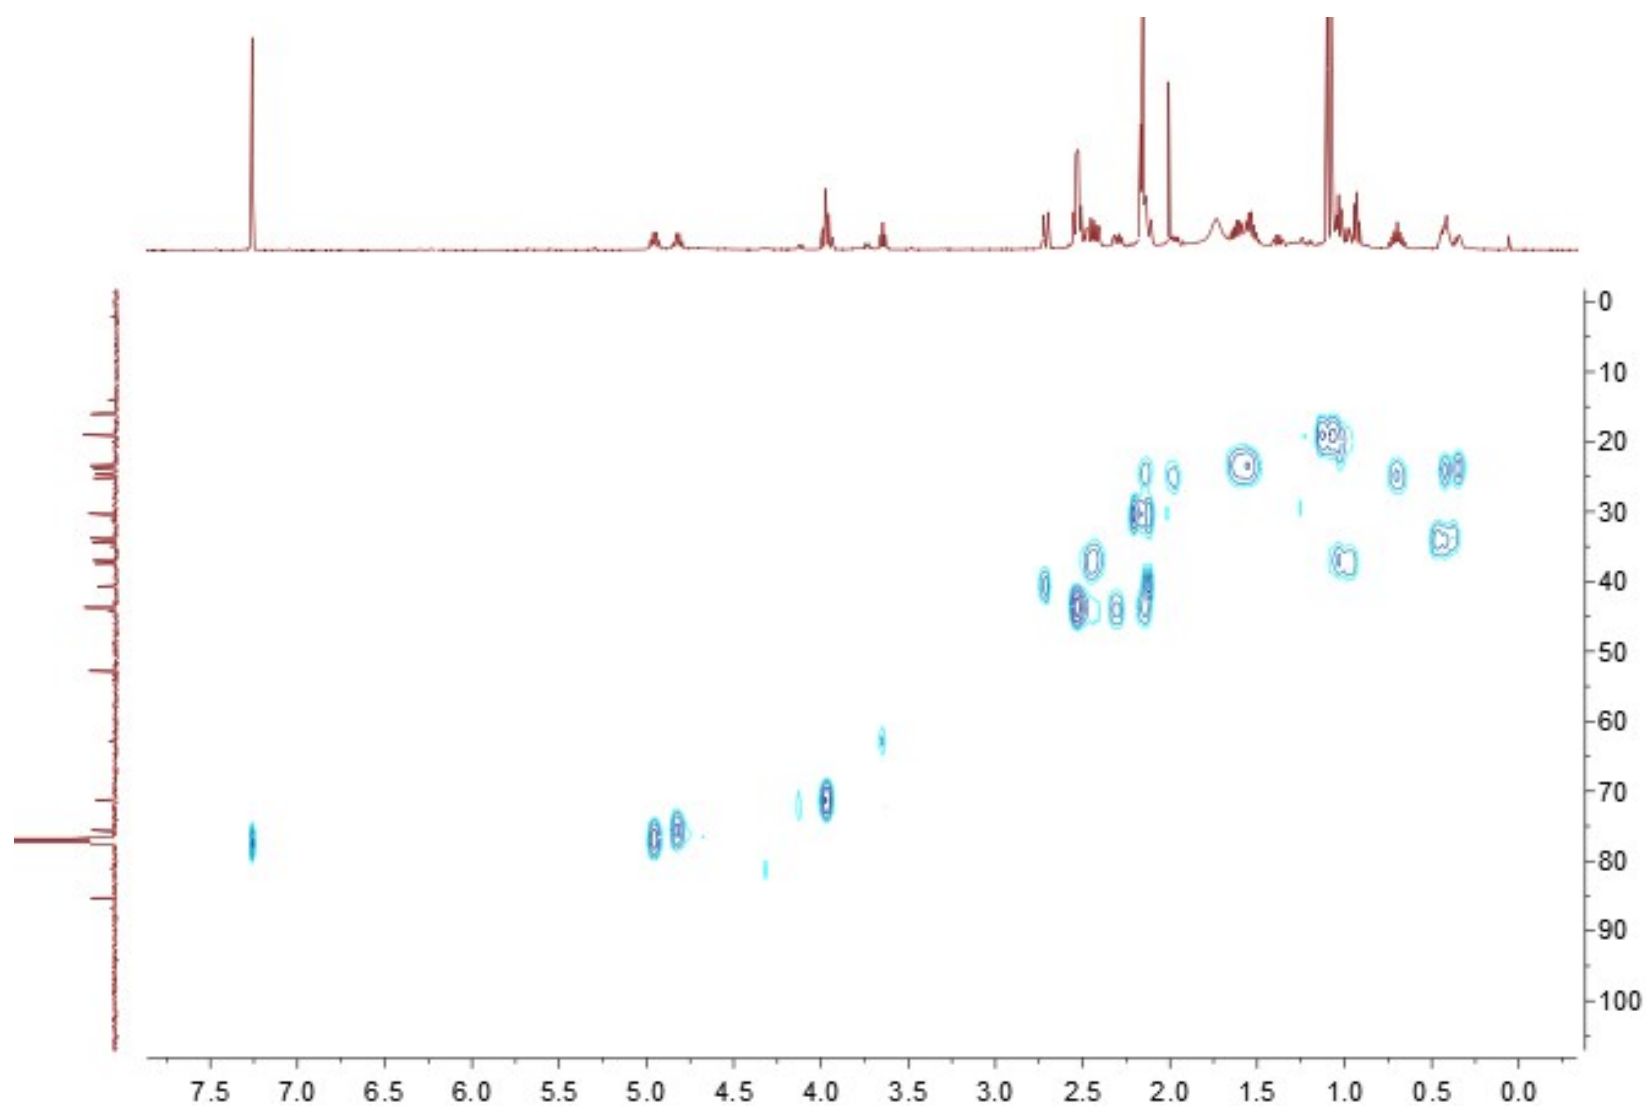

**Figure S12.** HSQC spectrum of dicarabrone C (**2**) in  $\text{CDCl}_3$

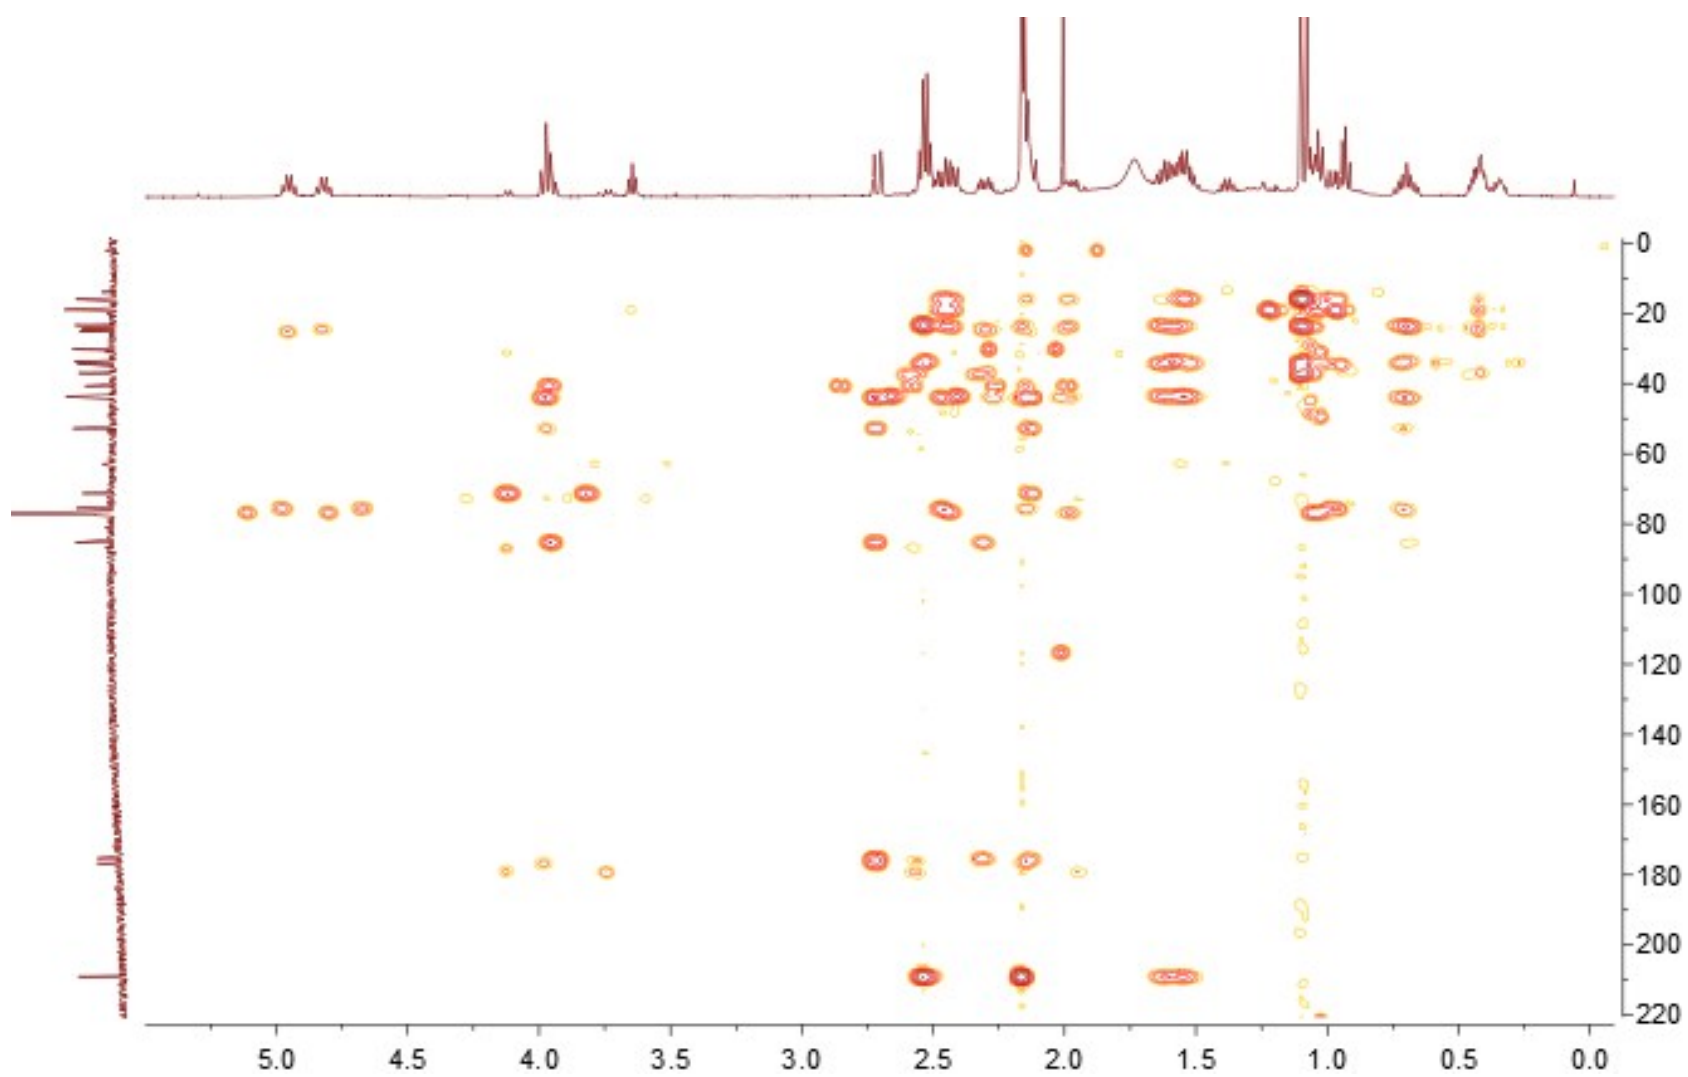

**Figure S13.** HMBC spectrum of dicarabrone C (**2**) in CDCl<sub>3</sub>

TMJ-0001802 CDCl3 ROESY

Sample Name:

Data Collected on:

000000000000

Archive directory:

Sample directory:

FidFile: ROESY

Pulse Sequence: ROESY

Solvent: cdcl3

Data collected on: May 27 2013

Temp. 29.9 C / 293.1 K

Operator: chempack

Relax. delay 1.000 sec

Acq. time 0.167 sec

Width 1542.0 Hz

20 Width 1542.0 Hz

8 repetitions

2 x 280 increments

OBSERVE H1, 399.7904828 MHz

DATA PROCESSING

Gauss apodization 0.942 sec

F1 DATA PROCESSING

Gauss apodization 0.612 sec

FT size 2048 x 2048

Total time 1 hr, 39 min

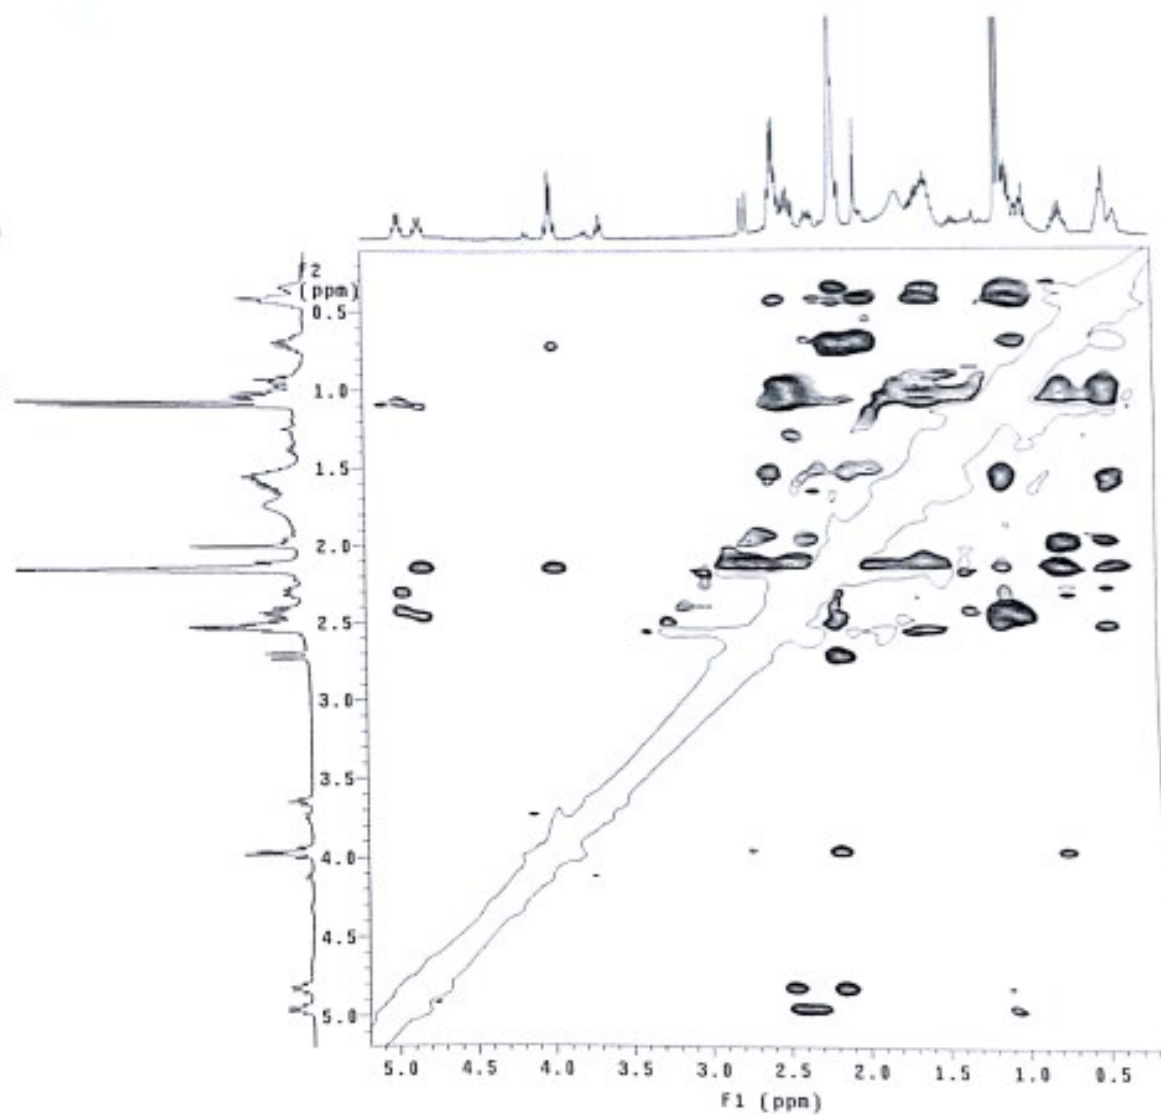

**Figure S14.** ROESY spectrum of dicarabrone C (**2**) in CDCl<sub>3</sub>

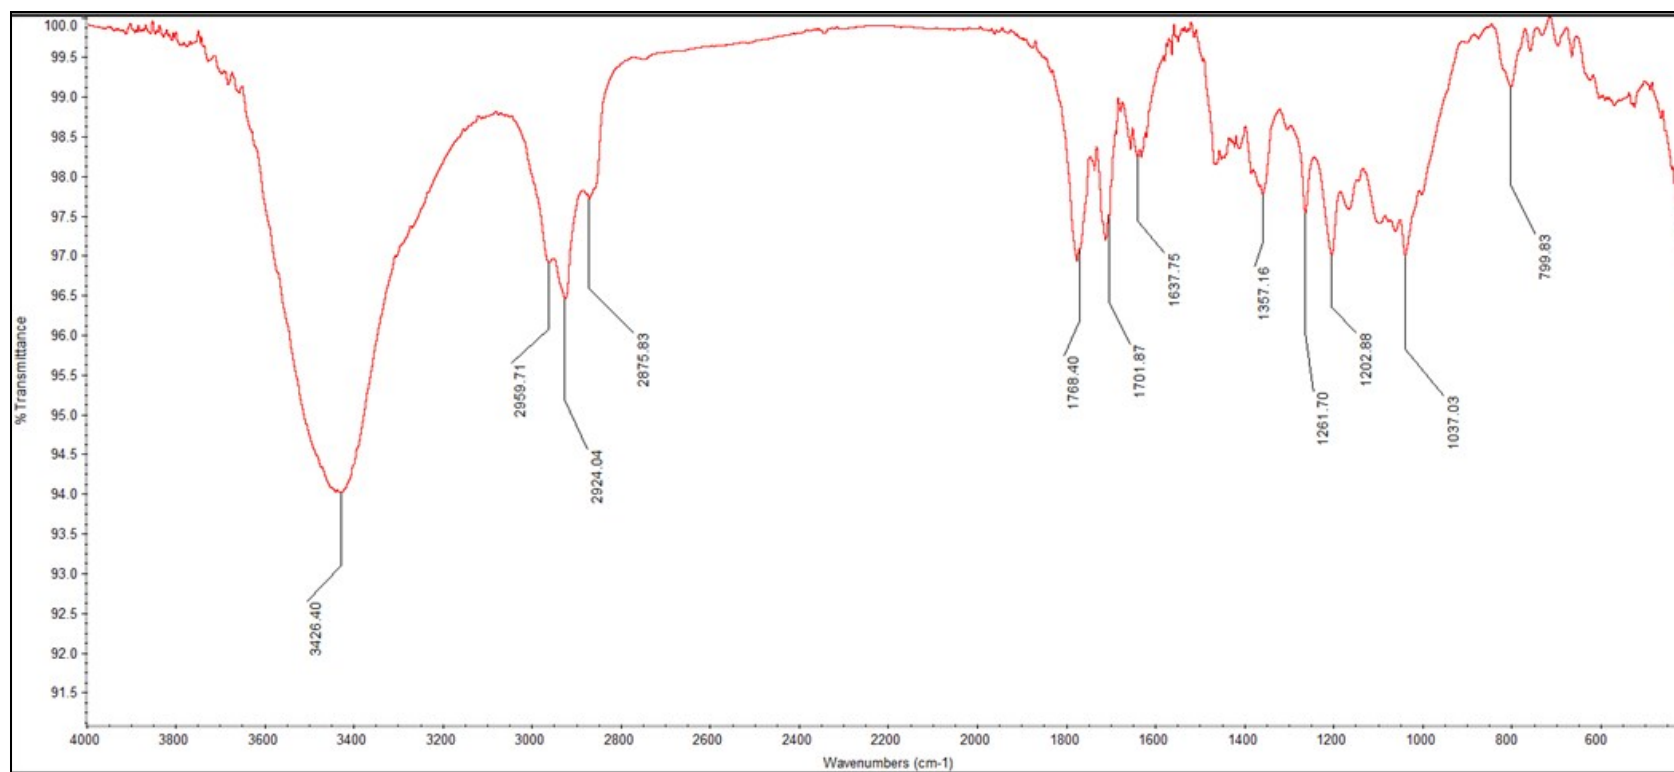

**Figure S15.** IR spectrum of dicarabrone C (**2**)

# Elemental Composition Report

Page 1

Tolerance = 10.0 PPM / DBE: min = -1.5, max = 50.0  
Isotope cluster parameters: Separation = 1.0 Abundance = 1.0%

Monoisotopic Mass, Odd and Even Electron Ions  
36 formula(e) evaluated with 1 results within limits (up to 20 closest results for each mass)

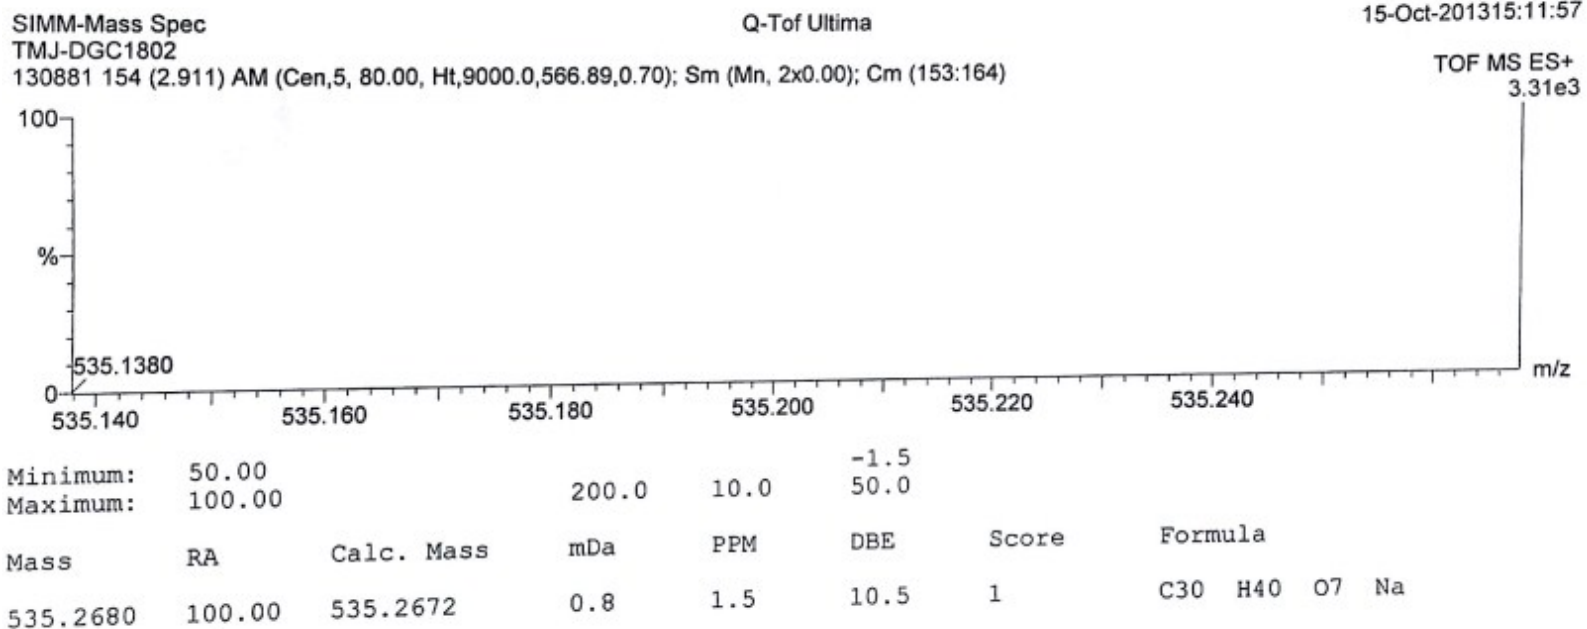

Figure S16. HRESI(+)MS spectrum of dicarabrone C (2)

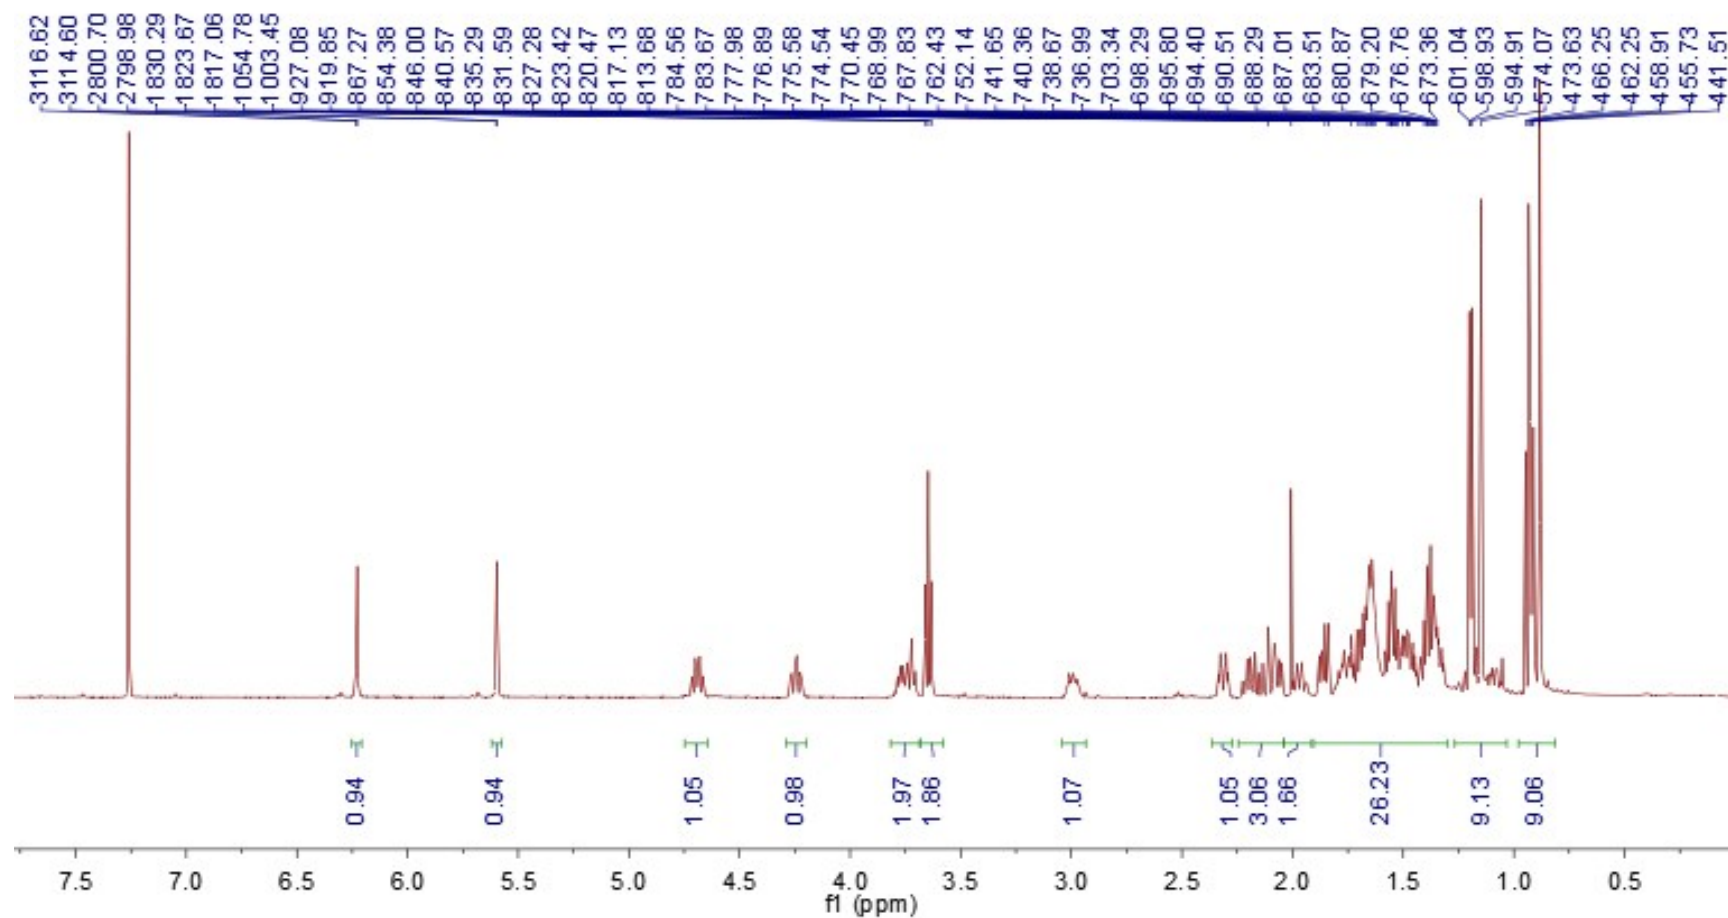

**Figure S17.**  $^1\text{H}$  NMR spectrum of dipulchellin A (**3**) in  $\text{CDCl}_3$

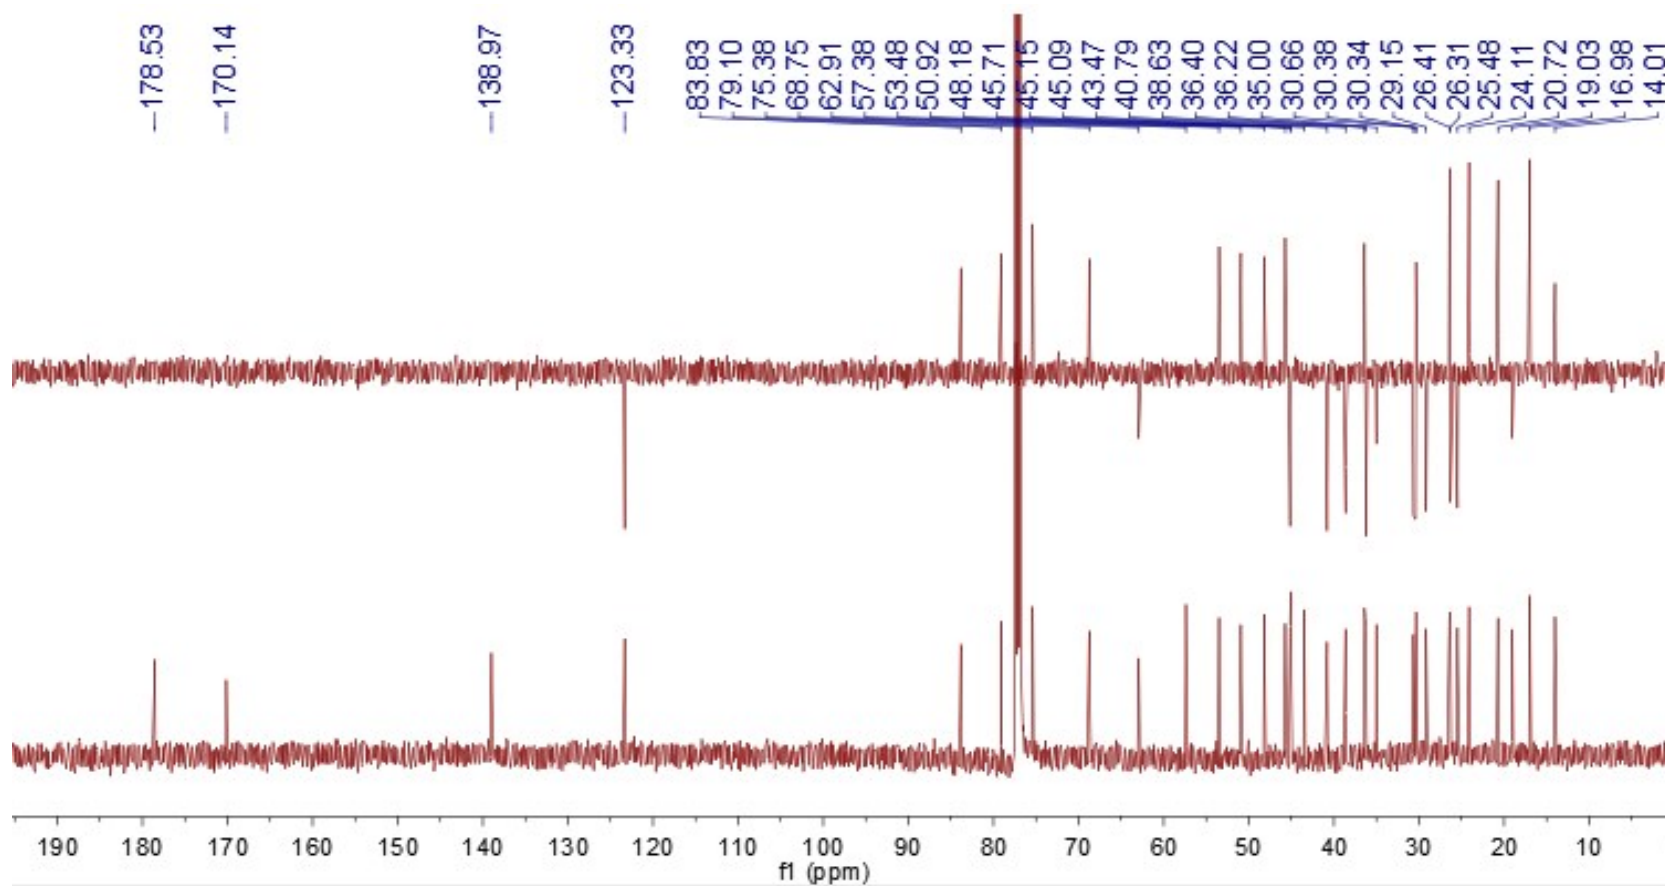

**Figure S18.** <sup>13</sup>C NMR spectrum of dipulchellin A (3) in CDCl<sub>3</sub>

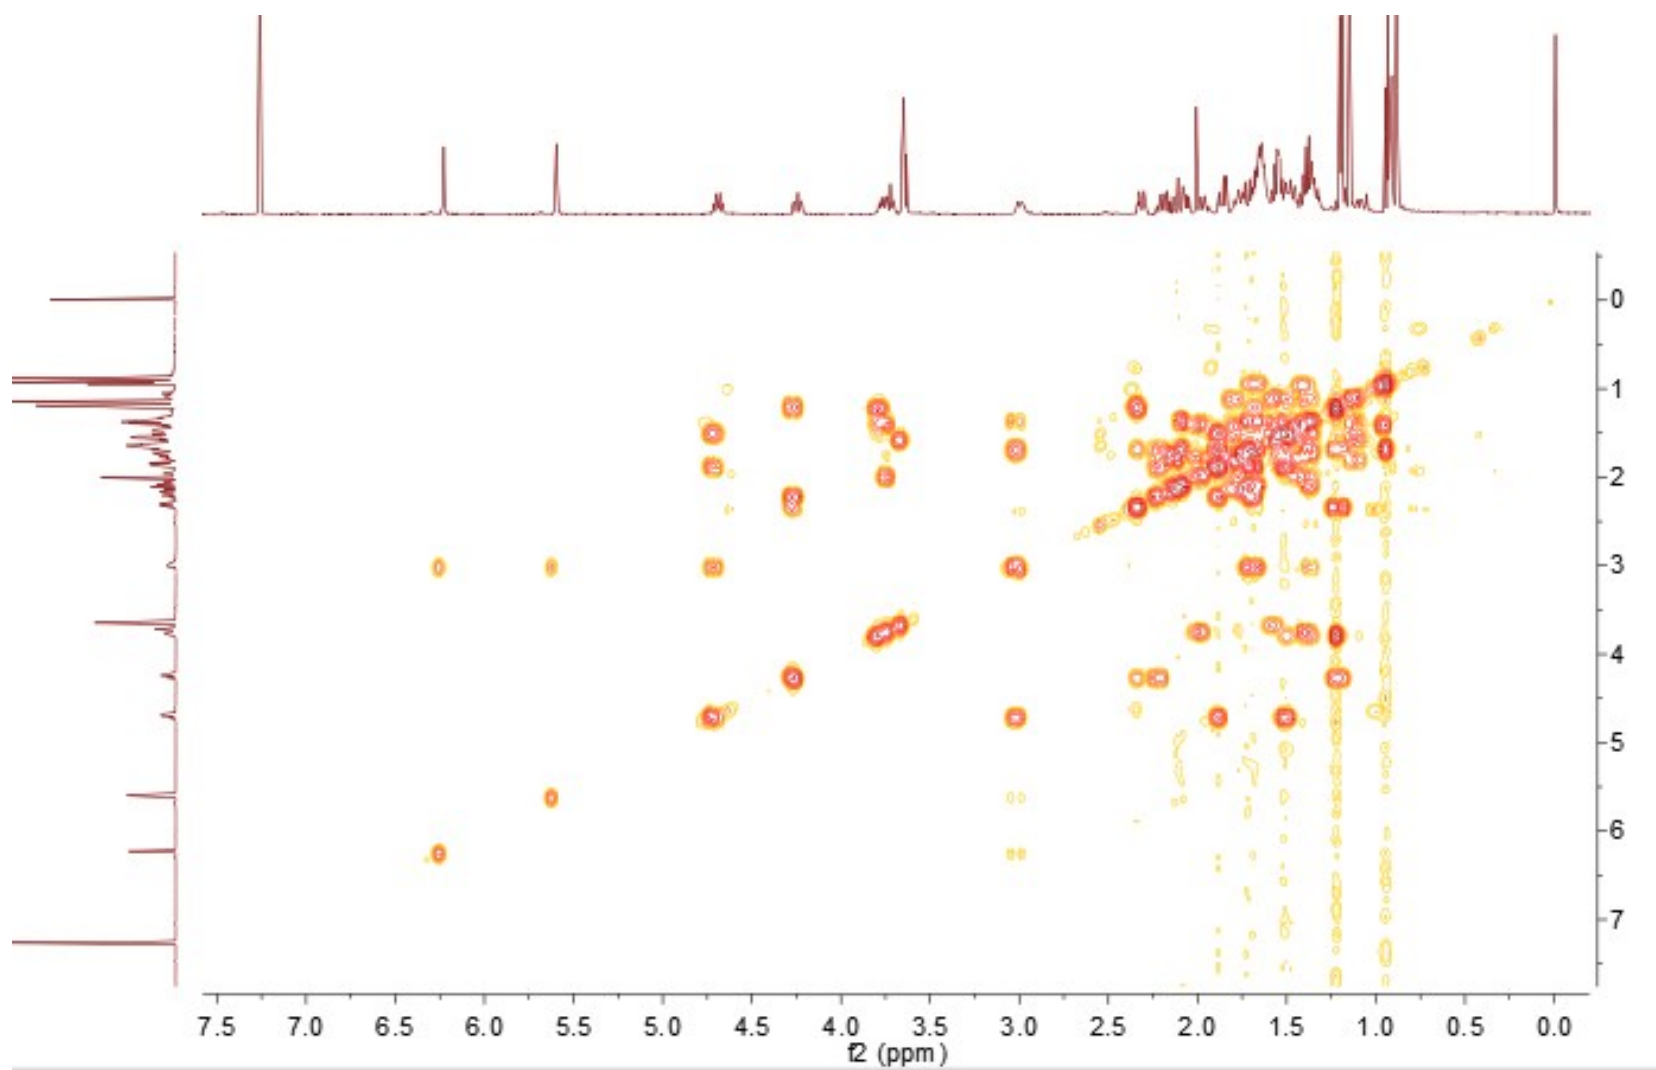

**Figure S19.**  $^1\text{H}$ - $^1\text{H}$  COSY spectrum of dipulchellin A (**3**) in  $\text{CDCl}_3$

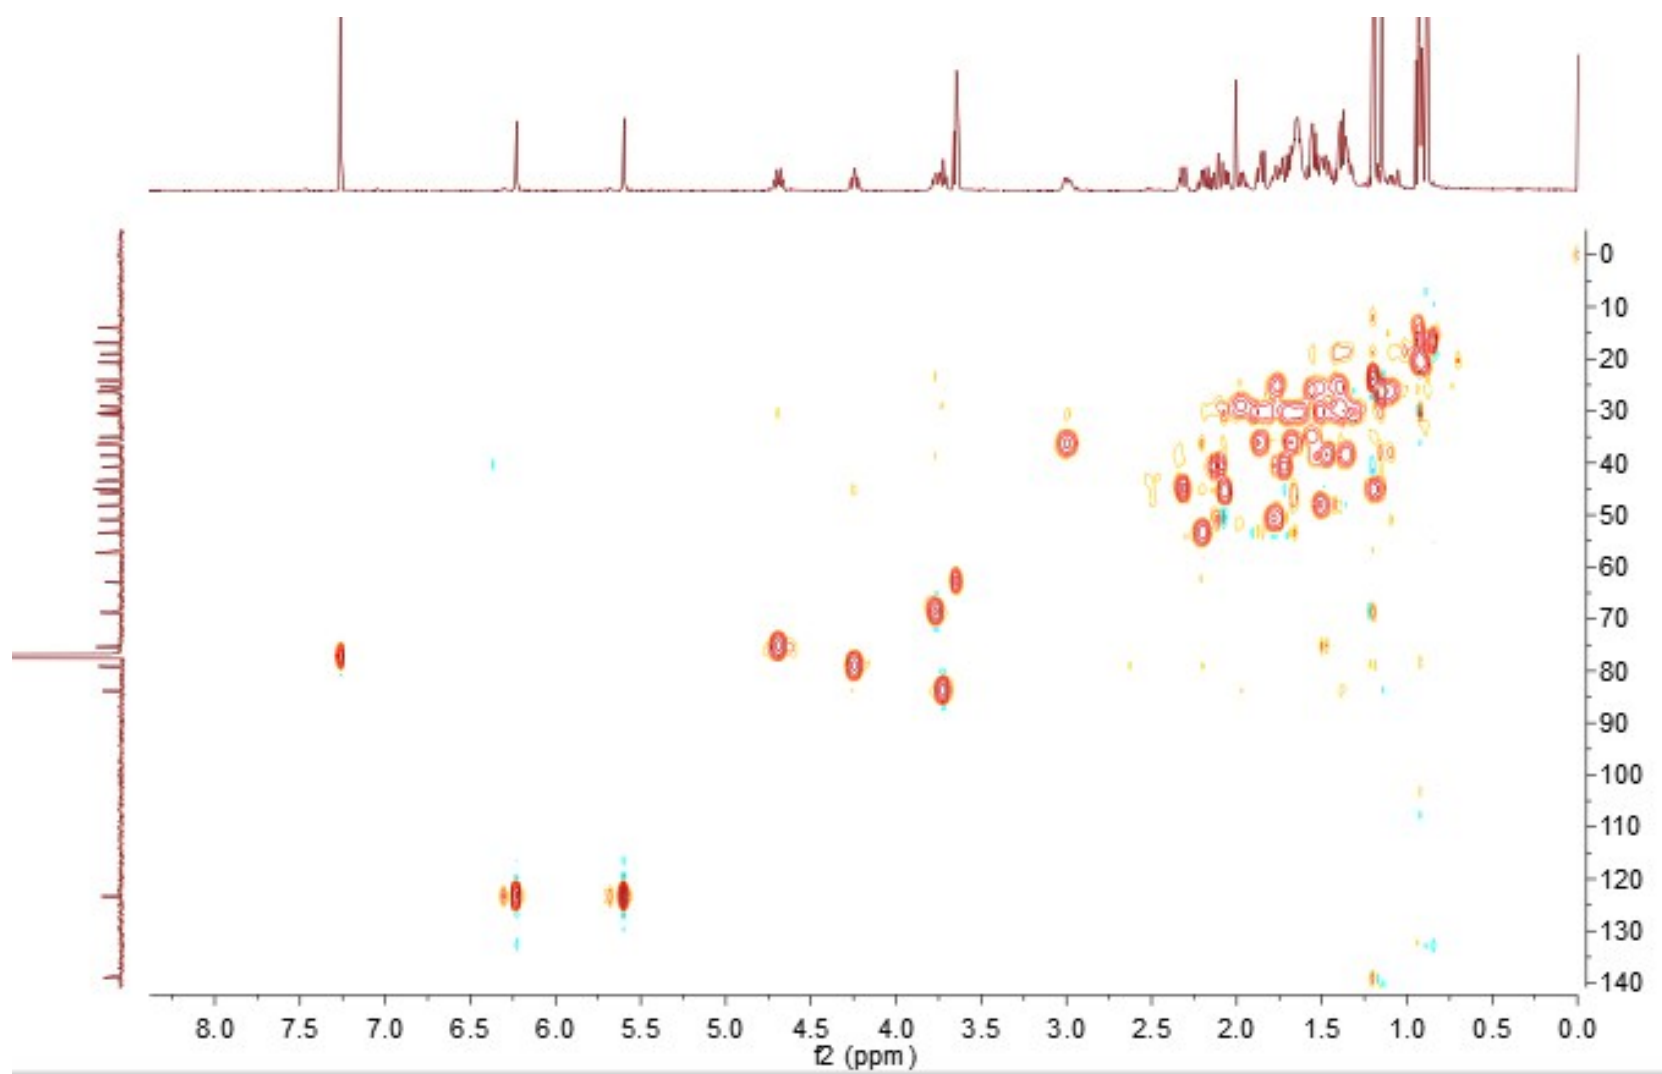

**Figure S20.** HSQC spectrum of dipulchellin A (**3**) in CDCl<sub>3</sub>

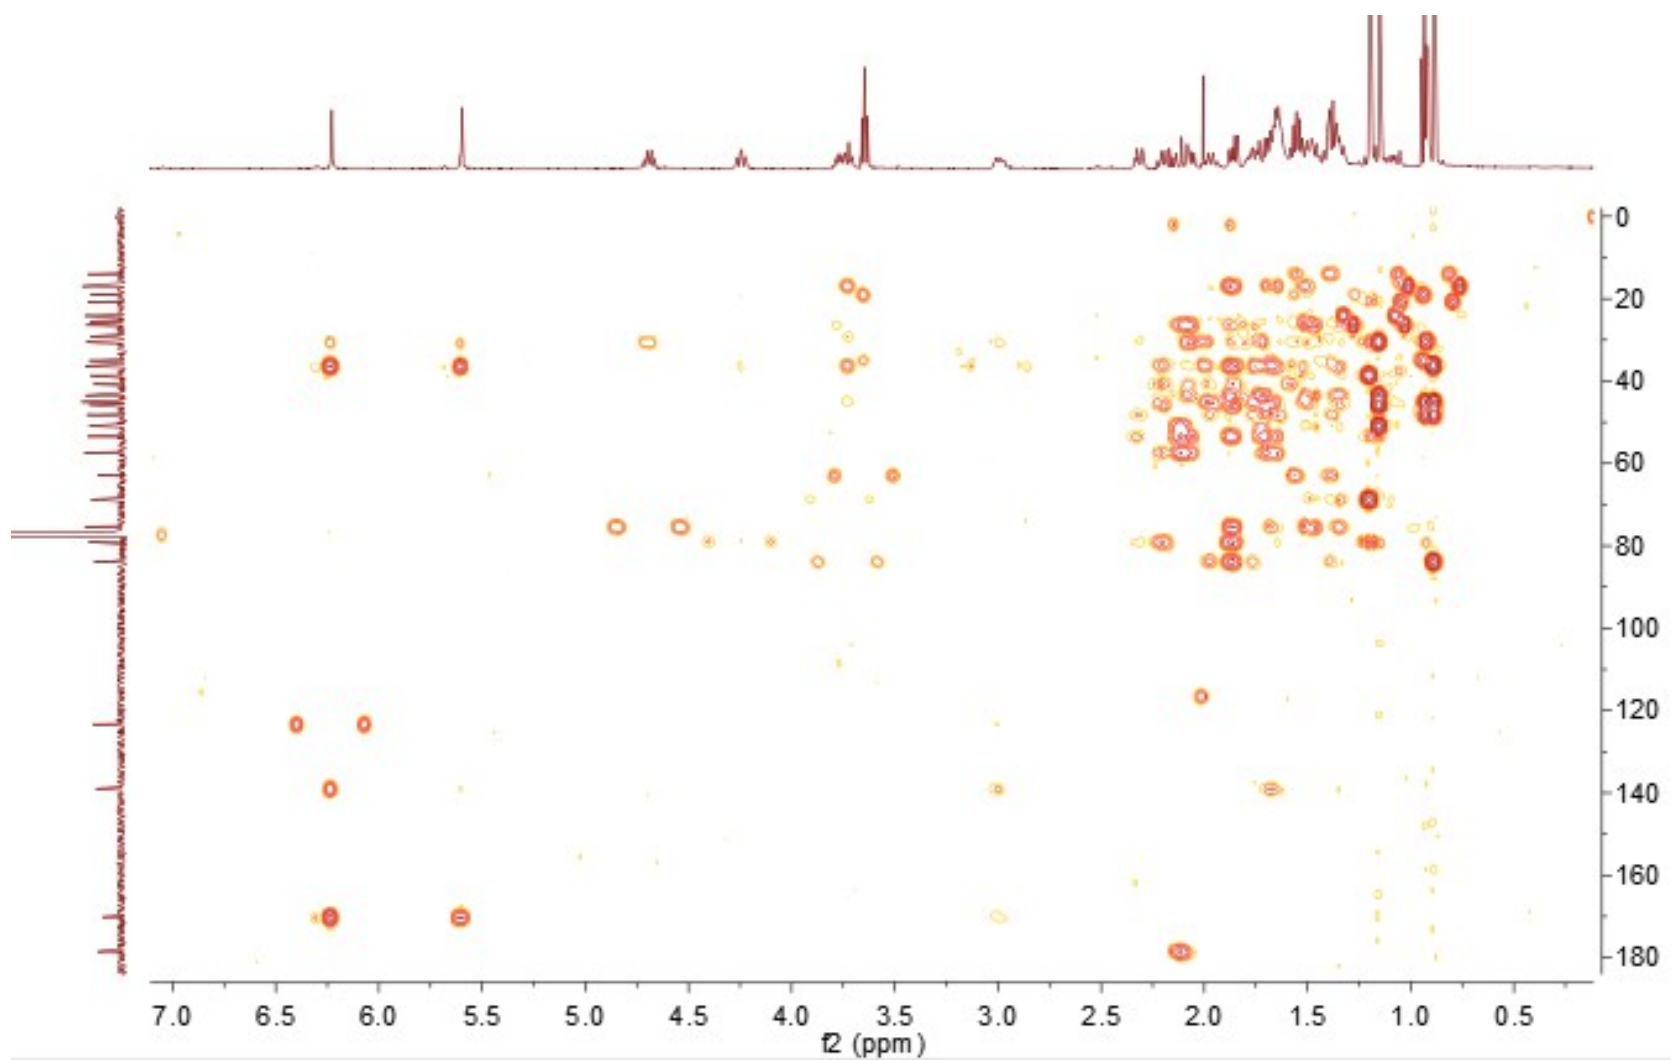

**Figure S21.** HMBC spectrum of dipulchellin A (**3**) in CDCl<sub>3</sub>

TN3-1602 CDCL3 ROESY

Sample Name:

Data Collected on:

400MR-vnmr400

Archive directory:

Sample directory:

FidFile: ROESY

Pulse Sequence: ROESY

Solvent: cdcl3

Data collected on: Sep 5 2013

Operator: chenpack

Relax. delay 1.000 sec

Acq. time 0.107 sec

Width 9542.0 Hz

2D Width 9542.0 Hz

6 repetitions

2 x 200 increments

OBSERVE H1, 399.7904073 MHz

DATA PROCESSING

Gauss apodization 0.043 sec

F1 DATA PROCESSING

Gauss apodization 0.011 sec

FT size 2048 x 2048

Total time 1 hr, 32 min

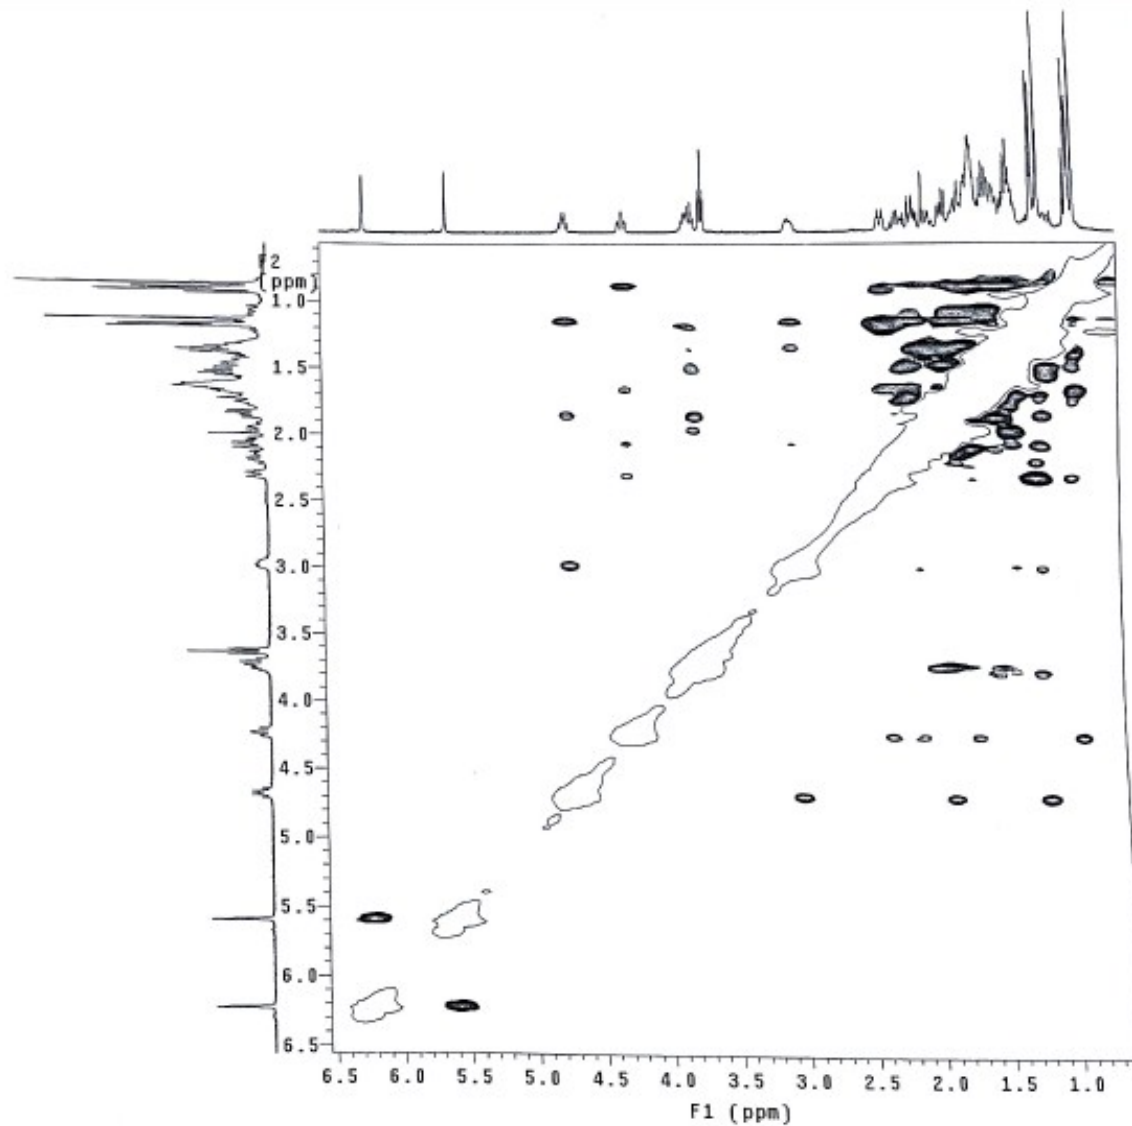

**Figure S22.** ROESY spectrum of dipulchellin A (**3**) in CDCl<sub>3</sub>

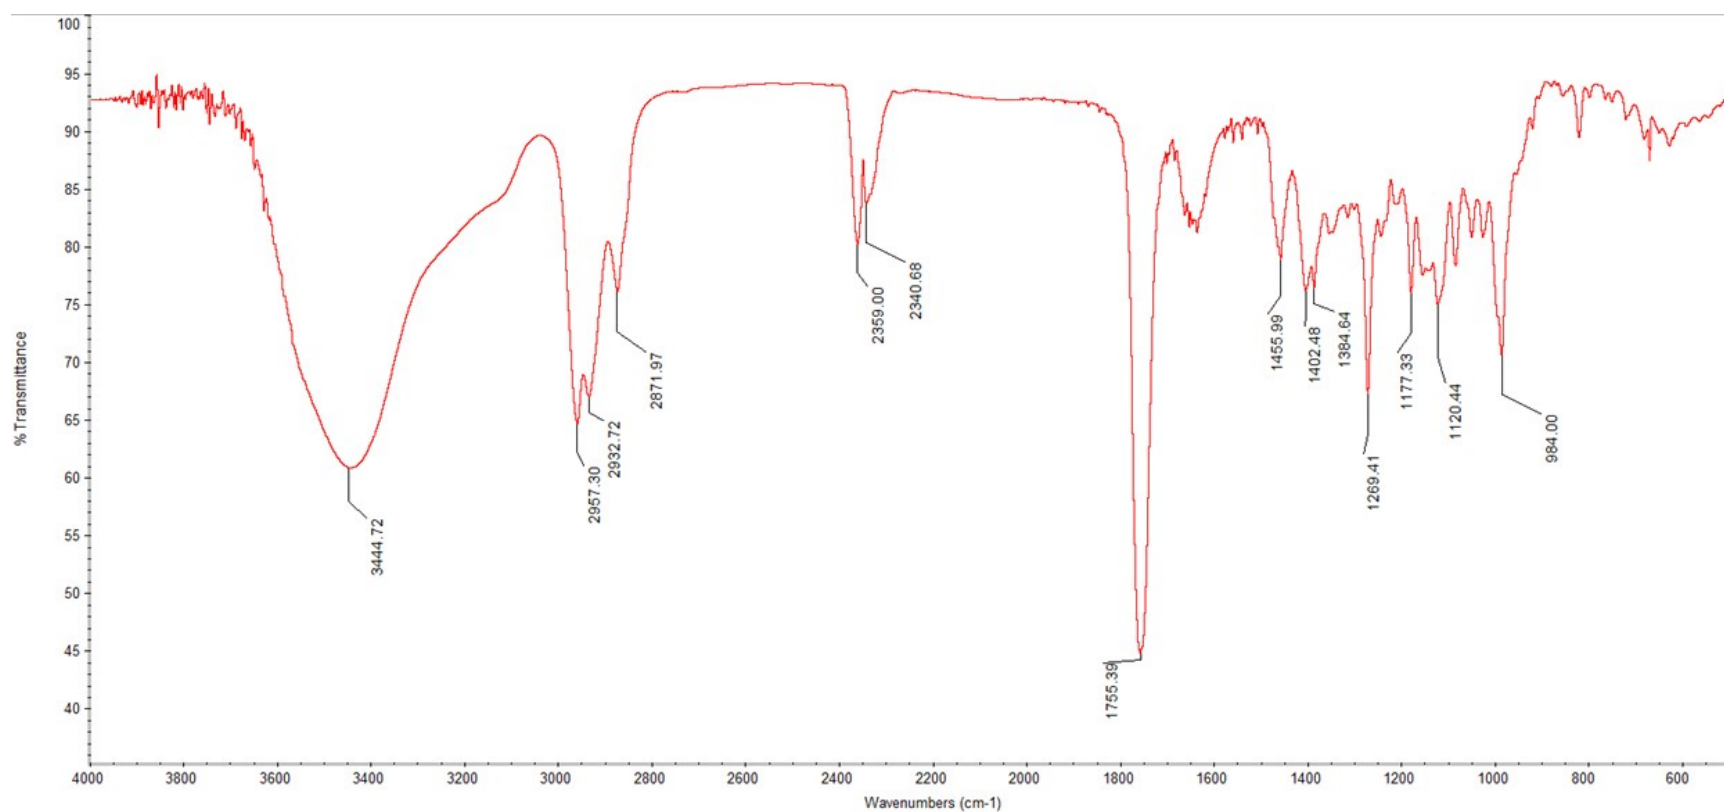

**Figure S23.** IR spectrum of dipulchellin A (3)

HR\_150534 #27 RT: 0.06 AV: 1 NL: 1.32E8

F: FTMS + c ESI Full ms [150.00-2000.00]

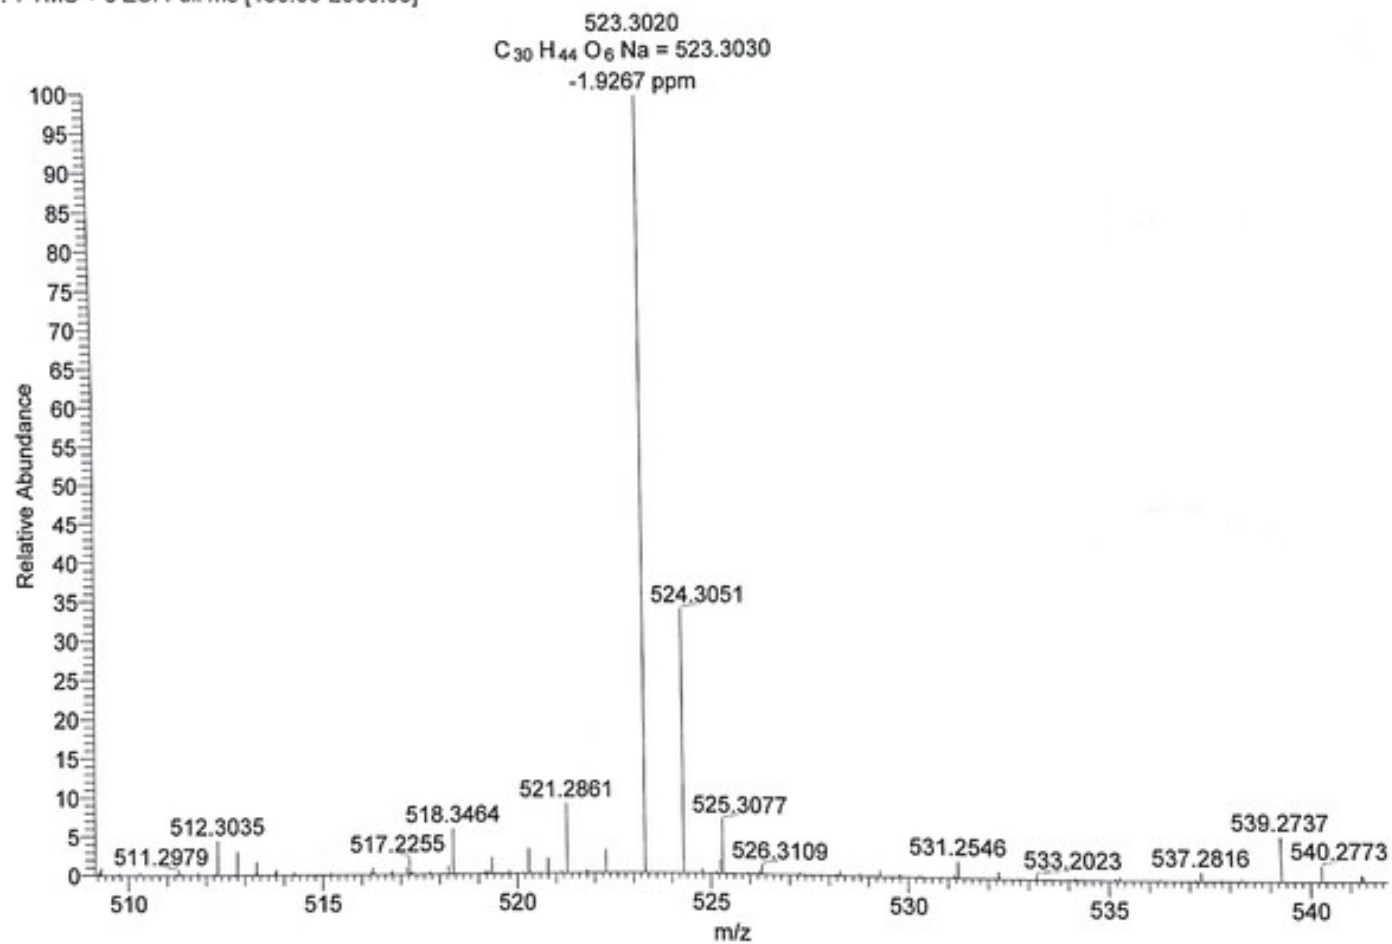

Figure S24. HRESI(+)MS spectrum of dipulchellin A (3)
